# Supplementary material for: Applications of sewage sludge in construction materials: a systematic review
Source: Research Square preprint supplement (doi:10.21203/rs.3.rs-8296751/v1), 2026-01-14
Supplement: Supplementary file 1 [file 8a681763ab9bd6676312dc2e.xlsx]

## Sheet: Sheet1
	Author(s), Year	Title	Main objective	Year of Publication	Study locations	source of sludge		Treatment method
1	Yifan Zhou, Guanghua Cai, Chris Cheeseman, Jiangshan Li, Chi Sun Poon	Sewage sludge ash-incorporated stabilisation/solidification for recycling and remediation of marine sediments	To compare the effects of different binder formulations (cement, lime-ISSA, and cement-ISSA) on the S/S performance of marine sediments and to study the role of ISSA for the S/S of two types of sediments.	2022	Hong kong	local sewage sludge incineration plant	2	Incineration	1
2	Fuliao Zou, Zhen Leng, Ruijun Cao, Gaoyang Li, Yuan Zhang, Anand Sreeram	Performance of zeolite synthesized from sewage sludge ash as a warm mix asphalt additive	To synthesize zeolite from sewage sludge ash (SSA) as a foaming-based warm mix asphalt (WMA) additive and comprehensively characterize its performance.	2022	Department of Civil and Environmental Engineering, The Hong Kong Polytechnic University, Hung Hom, Kowloon, Hong Kong	Sewage sludge from wastewater treatment	2	Alkaline fusion and hydrothermal reaction	4
3	Yi-fan Zhou, Jiang-shan Li, Jian-xin Lu, Chris Cheeseman, Chi Sun Poon	Sewage sludge ash: A comparative evaluation with fly ash for potential use as lime-pozzolan binders	To study the effects of different types of lime on the mechanical properties of lime-pozzolan systems using finely-ground sewage sludge ash (FSSA) and compare it with coal fly ash (FA).	2020	Hong Kong, China	wastewater treatment	1	Incineration and grinding to obtain finely-ground sewage sludge ash (FSSA)	1
4	Wentao Zhou, Fengming Yang, Ruijian Zhu, Ge Dai, Weijie Wang, Wenlong Wang, Xinli Guo, Jinyang Jiang, Zengmei Wang	Mechanism analysis of pore structure and crystalline phase of thermal insulation bricks with high municipal sewage sludge content	Mechanism analysis of pore structure and crystalline phase of thermal insulation bricks with high municipal sewage sludge content	2020	Nanjing, PR China	Municipal sewage sludge (MSS) from sewage treatment	2	Thermal treatment	1
5	Xianliang Zhou, Yulin Chen, Changwu Liu, Fan Wu	Preparation of artificial lightweight aggregate using alkali-activated incinerator bottom ash from urban sewage sludge	To investigate the feasibility of preparing lightweight aggregates (LWAs) using sewage sludge ash (SSA) and to assess their physical and mechanical properties.	2022	Chengdu, China	Urban sewage sludge (Chengdu Sewage Treatment Plant)	2	Incineration	1
6	Yitong Zhou, Peng Yu, Hongtao Yang, Shuyang Li, Sheng He	Pore structure and compressive strength of alkali activated mortar with sewage sludge ash (SSA) under optimal incineration conditions	Investigate the utilization of SSA in alkali-activated cementitious material and establish a relationship model between compressive strength and pore structure.	2024	Nanning, PR China	Wastewater treatment	1	Incineration at 800℃ for 1 h and annealing cooling	1
7	Yi-fan Zhou, Jiang-shan Li, Jian-xin Lu, Chris Cheeseman, Chi Sun Poon	Recycling incinerated sewage sludge ash (ISSA) as a cementitious binder by lime activation	The research focuses on developing an eco-friendly cementitious binder by lime activation of incinerated sewage sludge ash (ISSA).	2019	Hong Kong, China	Sewage Treatment	2	Incineration	1
8	Yifan Zhou, Jianxin Lu, Jiangshan Li, Chris Cheeseman, Chi Sun Poon	Effect of NaCl and MgCl2 on the hydration of lime-pozzolan blend by recycling sewage sludge ash	Investigate the mechanical properties and microstructural findings of the lime-sewage sludge ash binder under the effects of NaCl and MgCl2.	2021	Hong Kong and Wuhan, China	Sewage sludge ash (from sewage treatment)	2	Incineration	1
9	Xianliang Zhou , Xiaojun Zhou , Ling He , Yingda Zhang	Effect of sewage sludge ash on mechanical properties, drying shrinkage and high-temperature resistance of cement mortar	This study delves into the profound impact of substituting SSA for sand in cement mortar, examining fresh and mechanical properties, drying shrinkage, and high-temperature resistance.	2024	Xihua University, Chengdu, China	Wastewater treatment (Chengdu No.1 Sewage Treatment Plant)	1	Incineration	1	ZnO	SrO	MnO	Loss
10	Hamdy A. Abdel-Gawwad, Samah A. Sanad, Mona S. Mohammed	A clean approach through sustainable utilization of cement kiln dust, hazardous lead-bearing, and sewage sludges in the production of lightweight bricks	The study explores the sustainable utilization of cement kiln dust, hazardous lead-bearing, and sewage sludges in producing lightweight bricks.	2020	Cairo, Egypt	industrial sources (like glass polishing), dry-bed sludge from wastewater treatment,	3	Alkali-activation process	4	0.19	0	0.21	7.13
11	Tomasz Zdeb, Tomasz Tracz, Marcin Adamczyk	Physical, mechanical properties and durability of cement mortars containing fly ash from the sewage sludge incineration process	To investigate the possibility of disposing of sewage sludge ash by including it in cement composites and to test the mechanical properties and durability of these composites.	2022	Cracow, Poland	municipal sewage treatment plant	2	Thermal treatment (incineration at about 850°C)	1
12	ZHEN Guangyin, ZHOU Haiyan, ZHAO Tiantao, ZHAO Youcai	Performance Appraisal of Controlled Low-strength Material Using Sewage Sludge and Refuse Incineration Bottom Ash	Explore the possibility of using sewage sludge together with bottom ash as raw materials in the production of CLSM to expand the use of these by-products for potential applications.	2012	Shanghai, China	Sewage Treatment Plant	2	Dewatered and oven-dried at 65°C	2
13	Laihao Yu, Yingyi Zhang, Zhenghao Zhang, Jialong Yang	Conversion of recycled sludge waste into high value-added ceramics as engineering construction materials: Fabrication, characterization and performance evaluation	To utilize wastewater treatment plant sludge (WTPS) as an alternative feedstock for clay to develop high value-added construction ceramic materials	2023	Anhui University of Technology, Maanshan, Anhui Province, China; Shanghai Meishan Iron and Steel Limited by Share Ltd, Nanjing, Jiangsu Province, China	Wastewater Treatment Plants	1	Dried and ground into fine powder	2
14	Zhikun Zhang, Lei Zhang, Yulei Yin, Xuanye Liang, Aimin Li	The recycling of incinerated sewage sludge ash as a raw material for CaO–Al2O3–SiO2–P2O5 glass-ceramic production	To investigate the feasibility of producing CaO–Al2O3–SiO2–P2O5 glass-ceramics from ISSA by a two-stage sintering cycle of nucleation and crystallization without any pressure and binder.	2015	Dalian, China	Wastewater treatment plant	1	Incineration at 900°C followed by a two-stage sintering cycle of nucleation and crystallization.	1
15	Qian Zhang, Haijun Lu, Junzhu Liu, Weiwei Wang & Xiong Zhang	Hydraulic and mechanical behavior of landfill clay liner containing SSA in contact with leachate	Investigate the hydraulic and mechanical behavior of landfill clay liner containing sewage sludge ash (SSA) in contact with leachate.	2017	Wuhan, China	wastewater treatment.	1	Sewage sludge was dried, ground, incinerated at 850 °C, and sieved through a 200-mesh screen.
16	O. S. Zalygina, S. E. Barantseva	The Use of Excess Activated Sludge from Municipal Sewage Treatment Works in Production of Construction Ceramics	To develop a ceramic mixture for brick production using excess activated sludge from municipal sewage treatment works, and to assess the environmental safety and efficiency of this method.	1998	Belarus	Municipal sewage treatment works	2	Stabilization and dehydration, followed by use as a burning-out additive in brick production.
17	Y.M. Zhang, L.T. Jia, H. Mei, Q. Cui, P.G. Zhang, Z.M. Sun	Fabrication, microstructure and properties of bricks fired from lake sediment, cinder and sewage sludge	Investigate the use of lake sediment, cinder, and sewage sludge to produce fired bricks and study their properties	2016	Jiangsu, China	Sewage Treatment Plant	2	Dried, crushed into powders, and screened by a 2 mm-sieve	2
18	Martina Záleská, Zbyšek Pavlík, Milena Pavlíková, Lenka Scheinherrová, Jaroslav Pokorný, Anton Trník, Petr Svora, Jan Fořt, Ondřej Jankovský, Zbigniew Suchorab, Robert Černý​​	Biomass ash‑based mineral admixture prepared from municipal sewage sludge and its application in cement composites​​	To analyze the properties of biomass ash prepared by incineration of municipal sewage sludge and its potential use as an eco-efficient admixture to cement- and lime-based binders​​	2017​​	Lublin, Poland​​	municipal wastewater treatment plant	1	Thermal treatment at 700°C followed by mechanical activation by milling​​	1
19	Tuani Zat, Samile Raiza Carvalho Matos, Paulo Ricardo de Matos, Jordana Georgin, Luciano Pivoto Specht, Jardel Pereira Gonçalves, Gihad Mohamad, Erich D. Rodríguez	Sustainable red ceramic block: recycling of a sewage sludge as raw material	To evaluate the feasibility of using sewage sludge as a raw material in the production of red ceramic blocks.	2023	Santa Maria, Brazil	Wastewater treatment (residential)	1	Drying at 60°C for 48 hours	2
20	Chi-Liang Yen, Dyi-Hwa Tseng, Yue-Ze Wu	Properties of Cement Mortar Produced from Mixed Waste Materials with Pozzolanic Characteristics	To investigate the use of waste materials like sewage sludge ash, fly ash, and blast furnace slag as partial replacements for cement in mortar production, focusing on pozzolanic reactions and hydration characteristics.	2012	National Central University, Jhongli City, Taiwan	Wastewater treatment (sewage sludge)	1	Incineration at 700°C followed by grinding	1
										CuO	V2O5	MnO	SrO	PbO	Others	L.o.I.
21	Tuani Zat, Mariana Bandieira, Naquiele Sattler, Ana M. Segadães, Robinson C.D. Cruz, Gihad Mohamad, Erich D. Rodríguez	Potential re-use of sewage sludge as a raw material in the production of eco-friendly bricks	To assess the valorization of sewage sludge as a raw material in the production of red ceramic bricks by extrusion	2021	Brazil (Federal University of Santa Maria, University of Aveiro, University of Caxias do Sul)	(residential wastewater)	1	Drying and milling	2	0.07	0.05	0.03	0.02	0.01	0.03	26.23
22	Yan Xia, Minghao Liu, Yading Zhao, Xiaofeng Chi, Zhenyu Lu, Kan Tang, Junzhen Guo	Utilization of sewage sludge ash in ultra-high performance concrete (UHPC): Microstructure and life-cycle assessment	Investigate the feasibility of using sewage sludge ash (SSA) in ultra-high performance concrete (UHPC) and its impacts on microstructure, mechanical properties, and environmental aspects	2023	Harbin Institute of Technology, Harbin, China	Wastewater Treatment Plant	1	Incineration at 800°C, followed by grinding	1
23	Jiakuan Yang, Yafei Shi, Xiao Yang, Mei Liang, Ye Li, Yalin Li, Nan Ye	Durability of autoclaved construction materials of sewage sludge–cement–fly ash–furnace slag	To demonstrate an alternative for the final disposal of sewage sludge by using it as an additive in a mixture with cement, fly ash, and furnace slag, potentially developing new construction materials through autoclave curing.	2013	Wuhan, Hubei, PR China	wastewater treatment plant	1	Dewatering with inorganic conditioners (fly ash and lime) and autoclave curing	2
24	Ying Zhang, Yierfan Maierdan, Tianbao Guo, Bing Chen, Shuwei Fang, Ling Zhao	Biochar as carbon sequestration material combines with sewage sludge incineration ash to prepare lightweight concrete	To develop lightweight concrete using sewage sludge incineration ash and biochar, enhancing mechanical properties and achieving carbon sequestration.	2022	Shanghai Jiao Tong University, Shanghai, China	Sewage sludge	2	Incineration to produce ash	1
25	Laihao Yu, Yingyi Zhang, Zhenghao Zhang, Haobo Mao, Hongsong Han, Jialong Yang	Recycling reuse of municipal sewage sludge in sustainable structural materials: Preparation, properties, crystallization and microstructure analyses	The study aims to develop lightweight high-strength bricks using kaolin and recycled municipal sewage sludge and to analyze the effect mechanism of sintering temperature on product technical properties from both phase composition and microstructure.	2023	Anhui University of Technology, Maanshan 243002, Anhui Province, China	Municipal sewage sludge (from wastewater treatment)	2	Drying at 120°C for 15 hours, followed by crushing and sieving to obtain uniform particle sizes.	2
26	Fengming Yang, Wentao Zhou, Ruijian Zhu, Ge Dai, Weijie Wang, Wenlong Wang, Xinli Guo, Jinyang Jiang, Zengmei Wang	Synergistic effects of amorphous porous materials and anhydrous Na2CO3 on the performance of bricks with high municipal sewage sludge content	To explore the use of municipal sewage sludge, amorphous rice husk ash, and anhydrous Na2CO3 to produce thermal insulation bricks and to identify the optimal conditions for their production.	2021	Nanjing, PR China	municipal wastewater treatment plants	1	Dried and ground to particle size finer than 0.3 mm	2
27	Laihao Yu, Yingyi Zhang, Hong Wang, Zhenghao Zhang, Xin Shen, Hanlei Liu	Enhancing the sustainable production of cost-effective ceramics with high strength using kaolin, sewage sludge and blast-furnace slag	The study explored the cost-effective ceramic fabrication from 40 % sewage sludge, 10 % blast-furnace slag and 50 % kaolin through in-situ sintering method, enhancing the sustainable production of ceramic materials.	2024	Beijing, China	Urban domestic wastewater treatment	1	In-situ sintering method
28	Yohannes L. Yaphary, Sam Fong Yau Li	Enhanced immobilization of metal pollutants in sewage sludge ash (SSA)-cement pastes by calcium chloride and nitrate: Experimental and DFT studies	Investigate the effect of using CaCl2 and Ca(NO3)2 on metal pollutant immobilization of SSA-CPs and advance knowledge of their mechanisms	2023	Singapore	wastewater treatment	1	Incineration	1
29	Yan Xia, Minghao Liu, Yading Zhao, Junzhen Guo, Xiaofeng Chi, Jianxin Du, Donghang Du	Sewage sludge and rice husk co-combustion ash: Combustion behavior and cementitious property	To investigate the combustion behavior of sewage sludge, rice husk, and their mixture, and the mechanical properties of the co-combustion ash of sewage sludge and rice husk (CRS).	2023	Harbin, China	Wastewater Treatment Plant	1	Co-combustion with rice husk	1
30	Yonggeng Yan, Jian Zhao, Dewen Kong, Yuehu Wang, Wenpei Guo, Xin Yao	Green-brick preparation method for the resource utilization of sewage sludge and phosphogypsum with a low heavy-metal pollution risk	Investigate the effect of the dosage ratio of phosphogypsum to sewage sludge on their resource utilization and the mechanical and permeability performance of green bricks.	2024	china	Sewage treatment plant (wastewater treatment)	2	Press filtration of sludge from aerobic tanks
31	Kai Wu, Yuan Hu, Lintao Zhang, Linglin Xu, Zhenghong Yang	Promoting the sustainable fabrication of bricks from municipal sewage sludge through modifying calcination: Microstructure and performance characterization	To investigate the influence of calcination procedure (firing temperature and heating rate) on the performance of bricks made from municipal sewage sludge (MSS) and shale, and optimize the process for sustainable brick production.	2022	Shanghai, China	sewage treatment in a plant	2	Calcination (firing)	1
32	Yan Xia, Minghao Liu, Yading Zhao, Xiaofeng Chi, Junzhen Guo, Donghang Du, Jianxin Du	Hydration of ternary blended cements with sewage sludge ash and limestone: Hydration mechanism and phase assemblage	The study investigates the hydration kinetics and phase assemblage of ternary blended cements composed of sewage sludge ash (SSA) and limestone.	2023	Harbin Institute of Technology, Harbin, China	Urban Sewage (Sewage Sludge)	2	Incineration of sewage sludge at 800℃ with a muffle furnace	1
33	Yan Xia, Minghao Liu, Yading Zhao, Xiaobing Ma	Microstructure of Portland cement blended with high dosage of sewage sludge ash activated by Na2SO4	To investigate the effect of Na2SO4 on the hydration and microstructure of Portland cement blended with high dosage of sewage sludge ash	2022	Harbin, China	Municipal sewage disposal (Sewage sludge)	2	Incineration at 800°C	1
34	Zixiao Wu, Yumeng Jiang, Wenxin Guo, Junxun Jin, Minjin Wu, Dongsheng Shen, Yuyang Long	The long-term performance of concrete amended with municipal sewage sludge incineration ash	Evaluate the long-term environmental behavior of the optimal MSSIAC formulation under various environmental conditions	2021	Zhejiang Gongshang University, Hangzhou, China	Municipal sewage sludge from wastewater treatment	2	Incineration	1
35	Yan Xia, Minghao Liu, Yading Zhao, Xiaofeng Chi, Junzhen Guo, Donghang Du, Jianxin Du	Hydration mechanism and phase assemblage of blended cement with iron-rich sewage sludge ash	The hydration of Portland cement blended with iron-rich sewage sludge ash (IRSSA) was investigated.	2023	Harbin, China	Wastewater Treatment	1	Incineration at the temperature of 800°C	1
36	Kuen-Sheng Wang, Ing-Jia Chiou, Ching-Ho Chen, Davin Wang	Lightweight properties and pore structure of foamed material made from sewage sludge ash	Investigate the physical and chemical properties, foaming behavior, lightweight characteristics, and pore structure of materials made from sewage sludge ash (SSA).	2005	Taipei City and Kaohsiung City, Taiwan	wastewater treatment plant in Taipei City​	1	High-temperature incineration and grinding	1
37	Teng Wang, Yongjie Xue, Min Zhou, Yi Lv, Yuchi Chen, Shaopeng Wu, Haobo Hou .	Hydration kinetics, freeze-thaw resistance, leaching behavior of blended cement containing co-combustion ash of sewage sludge and rice husk .	To investigate the feasibility of developing building materials composed of ash from the co-combustion of rice husk and sewage sludge, analyzing hydration behavior, hydration kinetics, mechanical properties, freeze-thaw durability, and environmental performance .	2017 .	Wuhan, Hubei, China .	sewage sludge	2	Co-combustion of rice husk and sewage sludge at 815 ± 15 °C, followed by grinding in a ball mill .	1
38	Xingrun Wang, Yiying Jin, Zhiyu Wang, Yongfeng Nie, Qifei Huang, Qi Wang	Development of lightweight aggregate from dry sewage sludge and coal ash	To evaluate the feasibility of using dry sewage sludge (DSS) as the primary material for the production of lightweight aggregates, and assess the effects of adding coal ash (CA) on the properties of the aggregates.	2009	Beijing, China	municipal wastewater treatment	1	Mechanically dewatered via a belt press, dried in a stove at 105°C for 24 hours, and pulverized with a ball mill.	4
39	Yingrun Wang, Yiying Jin, Zhingyu Wang, Rasool Bux Mahar, Yongfeng Nie	Research on sintering characteristics and mechanisms of dried sewage sludge	Investigate the sintering behavior of dried sewage sludge and related sintering mechanisms	2008	Beijing, China	Municipal Wastewater Treatment Plant	1	Drying and sintering	2
40	Bernd wiebusch and Carl Franz seyfried	Utilization of sewage Sludge ash in brick and tile industry	to investigate the Utilization of sewage Sludge ash from a fluildized bed furnace as a clay susbsituite	1997	Haannover,Germany	not mentioned	5	Incineration	1
41	Tay & Show (1994)	Municipal Wastewater Sludge as Cementitious and Blended Cement Materials	Investigate the potential for using wastewater sludge in combination with limestone to produce cementitious building materials.	1994	Nanyang Technological University, Singapore	Municipal Wastewater Treatment	1	Incineration	1
42	Kuen-Sheng Wang, Ing-Jia Chiou	Foamed lightweight materials made from mixed scrap metal waste powder and sewage sludge ash	To explore the effects of different metallic foaming agents, made from waste aluminium products, on the foaming behaviours and engineering characteristics, as well as the microstructure of sewage sludge ash foamed lightweight materials	2004	Taipei City, Taiwan	Wastewater treatment plant (Ming Shen Wastewater Treatment Plant, Taipei City)	1	Incineration and grinding to produce sewage sludge ash	1
43	Sicong Tian, Jingjing Chen, Feng Yan, Candace Lang, Vladimir Strezov, and Zuotai Zhang	Cross-sectoral synergy between municipal wastewater treatment, cement manufacture and petrochemical synthesis via clean transformation of sewage sludge	To propose an integrated material-flow strategy to make full use of sewage sludge by combining its clean transformation with cement manufacture and petrochemical synthesis.	2020	Shenzhen, China	Municipal Wastewater Treatment	1	Multi-stage thermochemical conversion
44	S. Valls, A. Yagüe, E. Vázquez, C. Mariscal	Physical and mechanical properties of concrete with added dry sludge from a sewage treatment plant	Evaluate an alternative final destination for the growing production of sludge from sewage treatment plants by adding it to plain concrete with Portland cement.	2004	Sabadell–Riu Sec sewage treatment plant, near Barcelona, Spain	Sewage treatment plant (Sabadell–Riu Sec)	2	Drying at approximately 200°C with residual humidity about 15%	2
45	B.L.A. Tuan, C.-L. Hwang, K.-L. Lin, Y.-Y. Chen, M.-P. Young	Development of lightweight aggregate from sewage sludge and waste glass powder for concrete	Investigate the effects of different mass ratios of waste glass to sewage sludge and sintering temperatures on the properties of lightweight aggregate and its application in concrete.	2013	Local sewage treatment plant in Taiwan	Sewage sludge from a sewage treatment plant	2	Wet granulation process followed by sintering at various temperatures between 830–1100°C
46	Aruna Ukwatta, Abbas Mohajerani, Sujeeva Setunge, Nicky Eshtiaghi	Possible use of biosolids in fired-clay bricks	Investigate the possibility of using aged biosolids from Melbourne Eastern Water Treatment Plant in fired-clay bricks.	2015	Melbourne, VIC, Australia	wastewater treatment. Plant	1	Aerobic digestion, anaerobic digestion, alkaline stabilization, thermal drying, acid oxidation/disinfection, composting	3
47	Chen-Chiu Tsai, Kuen-Sheng Wang, Ing-Jia Chiou	Effect of SiO2–Al2O3–flux ratio change on the bloating characteristics of lightweight aggregate material produced from recycled sewage sludge	Investigate the characteristics of lightweight aggregates sintered from sewage sludge ash by modifying the proportion of the main components (SiO2–Al2O3–flux).	2006	Taiwan	Municipal Wastewater Treatment Plant	1	Incineration and sintering	1
48	Drazen Vouk, Domagoj Nakic, Nina Stirmer, Christopher Cheeseman	Influence of combustion temperature on the performance of sewage sludge ash as a supplementary cementitious material	Investigate the potential for using sewage sludge ash (SSA) as a supplementary cementitious material (SCM)	2018	Croatia	Wastewater Treatment (from WWTP Karlovac and WWTP Zagreb in Croatia)	1	Dehydration, anaerobic stabilization, lime addition, combustion at 800, 900, 1000 °C	2
49	J.-H. Tay, K.-Y. Show, D.-J. Lee, S.-Y. Hong	Reuse of wastewater sludge with marine clay as a new resource of construction aggregates	To explore the reuse of industrial sludge and marine clay in producing construction aggregates	2004	Singapore, Taiwan	Industrial (recycling of copper slag from blast cleaning of ship vessels)	2	Sintered	1
50	D. Vouk, D. Nakic, N. Stirmer, A. Baricevic	Effect of lime addition during sewage sludge treatment on characteristics of resulting SSA when it is used in cementitious materials	Examine the possibility and feasibility of incorporating SSA in cementitious materials with emphasis on the influence of lime addition during sludge treatment and incineration.	2016	Zagreb, Croatia	Wastewater Treatment Plant (WWTP)	1	Lime addition during sludge stabilization and incineration	4
51	Rkia Zari, Abderrazzak Graich, Karima Abdelouahdi, Mohamed Monkade, Abdelaziz Laghzizil, Jean-Michel Nunzi	Mechanical, Structural, and Environmental Properties of Building Cements from Valorized Sewage Sludges	To evaluate the mechanical, structural, and environmental properties of building cements made from valorized sewage sludges.	2023	Morocco (Involving Cadi Ayyad University, Chouaib Doukkali University, Mohammed V University, Queen’s University)	Industrial (specifically, from tannery wastewater treatment)	2	The sludge was dried, crushed, and directly used as a cement substitute.
52	S. Suzuki, M. Tanaka, T. Kaneko	Glass-ceramic from sewage sludge ash	Production of glass-ceramic using sewage sludge incinerated ash as the main material	1997	Tokyo, Japan	Wastewater Treatment	1	Incineration and vitrification	1
53	Gabriela Rutkowska, Piotr Wichowski, Joanna Fronczak, Mariusz Franus, Marek Chalecki	"Application of fly ashes from combustion of municipal sewage sludge (FAMSS) in the concrete technology"	Assessment of possibilities of re-using ashes from municipal sewage sludge combustion, based on a comparative analysis of properties of a concrete mix and hardened concrete containing FAMSS as well as siliceous and calcareous fly ashes.	2018	The study was conducted with materials sourced from Warsaw, Poland, specifically the "Czajka" sewage treatment plant and the "Siekierki" and "Bełchatów" power plants.	municipal sewage sludge.	2	Thermal conversion (combustion) of municipal sewage sludge	1
54	Maelson M. Souza, Marcos A. S. Anjos, Maria V. V. A. Sá, Nathaly S. L. Souza	Developing and Classifying Lightweight Aggregates from Sewage Sludge and Rice Husk Ash	Produce and classify various lightweight aggregates using sewage sludge and rice husk ash, comparing with commercial LWAs	2020	Natal, Brazil	sewage treatment plant (STP)	2	Sintering at 1100 to 1250°C	1
55	Pei Tang, Dongxing Xuan, Jiangshan Li, Hiu Wun Cheng, Chi Sun Poon, Daniel C.W. Tsang	Investigation of cold bonded lightweight aggregates produced with incineration sewage sludge ash (ISSA) and cementitious waste	Evaluate the feasibility of recycling ISSA and CSW into CBLAs aiming to use 100% wastes as raw materials and coupled with CO2 curing to enhance the properties of CBLAs	2020	Hong Kong	Wastewater treatment (ISSA)	1	Incineration to produce ISSA	1
56	Kaling Taki, Saurabh Choudhary, Sharad Gupta, Manish Kumar	Enhancement of Geotechnical Properties of Municipal Sewage Sludge for Sustainable Utilization as Engineering Construction Material	Utilize lime-stabilized sewage sludge for construction purposes by evaluating its geotechnical properties.	2020	Gandhinagar, India	wastewater treatment.	1	Lime treatment	4
57	Kaling Taki, Rohit Gahlot, Manish Kumar	Utilization of fly ash amended sewage sludge as brick for sustainable building material with special emphasis on dimensional effect	To address the disposal and management issue of sewage sludge (SS) by utilizing it as a resourceful construction material, and to investigate the effect of dimensional changes on the compressive strength of bricks made with SS and fly ash (FA).	2020	Gandhinagar, India	sewage treatment plant	2	Sun-drying, crushing, pulverization, heating to remove organics, and mixing with FA.
58	Nor Azalina Rosli, Hamidi Abdul Aziz, Mohamad Razip Selamat, Leonard Lik Pueh Lim	A mixture of sewage sludge and red gypsum as an alternative material for temporary landfill cover	Propose the recycling of sewage sludge (SS) and red gypsum (RG) as potential temporary landfill cover materials.	2020	Malaysia	Wastewater Treatment Plant in Sarawak, Malaysia​	1	Oven-dried at 103°C for 72 hours, then pulverized using mortar and pestle to granules no larger than 2 mm.
59	Prashant Shirodkar, Khyati Sonpal, Alan Norton, Ryan Weaver, Chris Tomlinson, Aaron Nolan, Dr. Yusuf Mehta, Dr. Kauser Jahan	Evaluation of Fatigue and Rutting Performance of Sewage Sludge Ash (SSA) in Asphalt Concrete	Compare the fatigue and rutting performance of HMA with (2%) and without SSA	2011	Rowan University, Glassboro, NJ, USA	Wastewater treatment	1	Incineration	1
60	Guray Salihoglu, Ali Mardani-Aghabaglou	Characterization of sewage sludge incineration ashes from multi-cyclones and baghouse dust filters as possible cement substitutes	Investigate the properties of SSA as a possible cement substitute by referring to the APC unit where the SSA was collected.	2020	Bursa, Turkey	Wastewater treatment	1	Incineration	1
61	mane Rhouch, Saad Ouakkas, Abdelghani Laamyem, Elhachmi Essadiqi, and Mustapha Faqir	Sewage Sludge Valorization in Fired Clay Bricks: Physical Properties and Radiological Assessment	To study the possibility of partially substituting clay in fired clay bricks with sewage sludge and evaluate their suitability as building materials.	2020	El Jadida, Morocco	wastewater treatment.	1	Dried and crushed, then used in raw form.	2
62	Vedat Pinarli & N. Kenan Emre	Constructive sludge management ‐ reutilization of municipal sewage sludge in Portland cement mortars	Investigate the properties of digested, dewatered, dried, and pulverized sludge blended Portland cement mortars.	1994	Kütahya Municipality, Turkey	Municipal sewage sludge (wastewater treatment)	2	Digested, dewatered, dried, and pulverized	2
63	Asmaa A. Negm, Tarek Y. Elrasasi, Hanem A. Khoder, Fatma M. Metawe, Mabrouk K. El-Mansy	Preparation, characterization, and physical properties of lightweight ceramics by using sewage sludge ash	To use SSA (sewage sludge ash) with clay to prepare lightweight ceramic having good physical properties for sustainable construction materials.	2020	Benha, Egypt	Wastewater treatment	1	Dried and crushed to pass 212 μm sieves	2
64	Zbyšek Pavlík, Jan Fořt, Martina Záleská, Milena Pavlíková, Anton Trník, Igor Medved, Martin Keppert, Petros G. Koutsoukos, Robert Černý	Energy-efficient thermal treatment of sewage sludge for its application in blended cements	To propose an energy-efficient thermal treatment of sewage sludge for its use in blended cements and analyze its properties and applicability.	2015	Patras, Greece	Municipal wastewater treatment	1	Thermal treatment at 700°C	1
65	Fahimeh Rezaee, Shahnaz Danesh, Mohammadreza Tavakkolizadeh, Mohammad Mohammadi-Khatami	Investigating chemical, physical and mechanical properties of eco-cement produced using dry sewage sludge and traditional raw materials	To investigate the effect of using dry municipal sewage sludge as one of the raw materials in Portland cement production on the mechanical and durability properties of an environmentally sustainable cement (eco-cement).	2019	Bojnurd, Iran	Municipal wastewater treatment	1	Dried and powdered	2
66	Maria Oliva, Felipe Vargas, Mauricio Lopez	Designing the incineration process for improving the cementitious performance of sewage sludge ash in Portland and blended cement systems	To make the incineration of sewage sludge more efficient and improve the sewage sludge ash produced as a supplementary cementitious material.	2019	Santiago, Chile	Wastewater treatment	1	Incineration at different temperatures and residence times	1
67	Yuanfeng Qi, Qinyan Yue, Shuxin Han, Min Yue, Baoyu Gao, Hui Yu, Tian Shao​​	Preparation and mechanism of ultra-lightweight ceramics produced from sewage sludge​​	Investigating the optimum conditions for preparing ultra-lightweight ceramics (ULWC) from sewage sludge and their mechanisms​​	2010​​	Shandong University, Jinan, Shandong Province, China​​	Wastewater treatment​	1	Dehydration, drying at 105°C for 4 hours, and crushing to pass sieve No. 100​​	2
68	Shih-Cheng Pan, Dyi-Hwa Tseng, Chih-Chiang Lee, Chau Lee	Influence of the fineness of sewage sludge ash on the mortar properties	To investigate the effect of sewage sludge ash (SSA) fineness on the properties of mortar.	2003	National Central University, Chungli, Taiwan	Wastewater treatment plant	1	Incineration and mechanical grinding	1
69	Nagaharu Okuno , Shiro Takahashi	Full scale application of manufacturing bricks from sewage		1997	Japan	Sewage treatment plant	2	incinerated sewage sludge ash and firing at about 1000°C	1
70	T. Onaka	Sewage can make Portland cement: a new technology for ultimate reuse of sewage sludge	To describe a process for cost-effective reuse of organic and inorganic components of sewage sludge in Portland cement	2000	Tagawa Plant of Aso Cement Co. Ltd., Fukuoka, Japan	Wastewater treatment plant	1	Pelletizing, drying, and burning in a cement kiln
71	J. Monzón, J. Payá, M.V. Borrachero, A. Córcoles	USE OF SEWAGE SLUDGE ASH(SSA)-CEMENT ADMIXTURES IN MORTARS	Study the influence of sewage sludge ash (SSA) on the strength and workability of cement-based mortars	1996	Valencia, Spain	Sewage treatment plant	2	Incineration to obtain ash	1
72	Domagoj Nakic, Drazen Vouk, Marijana Serdar, Christopher R. Cheeseman	Use of MID-MIX® treated sewage sludge in cement mortars and concrete	Evaluate the potential for using MID-MIX® sewage sludge (MSS) and MID-MIX® sewage sludge ash (MSSA) in mortars and concrete	2018	Koprivnica, Croatia	Wastewater treatment	1	MID-MIX® treatment involving Ca(OH)2 and CaO
73	M.A. Montero, M.M. Jordán, M.S. Hernández-Crespo, T. Sanfeliu	The use of sewage sludge and marble residues in the manufacture of ceramic tile bodies	Study the effects on the technological properties of a ceramic material when clay is substituted for urban sewage sludge and marble residue	2009	Alicante, Spain	Urban sewage treatment	2	Addition of sewage sludge and marble residue
74	K.J. Mun	Development and tests of lightweight aggregate using sewage sludge for nonstructural concrete	To efficiently treat sewage sludge and evaluate the feasibility of lightweight aggregate produced from it	2007	Jeonju city, Korea	Wastewater treatment	1	Sintered using a rotary kiln	1
75	Sara Naamane, Zakia Rais, Mustapha Taleb	The effectiveness of the incineration of sewage sludge on the evolution of physicochemical and mechanical properties of Portland cement	To study the influence of sewage sludge, treated at temperatures between 300 and 800 °C, on cement-based materials.	2016	Fez, Morocco	Industrial wastewater treatment	2	Thermal treatment (calcination) at temperatures between 300 and 800 °C	1
76	C. Martínez-García, D. Eliche-Quesada, L. Pérez-Villarejo, F.J. Iglesias-Godino, F.A. Corpas-Iglesias	Sludge valorization from wastewater treatment plant to its application on the ceramic industry	To assess the effect of incorporating waste sludge on the properties and microstructure of clay used for bricks manufacturing	2012	Jaén, South Spain	Wastewater treatment	1	Sludge was dried with an electric heater for 48 hours at 90°C to remove moisture, then crushed and ground to a powder suitable to pass through a 150 μm sieve
77	Ciarán J. Lynn, Ravindra K. Dhir, Gurmel S. Ghataora	Use of incinerated ash as a cement component in concrete: compressive strength modelling	To develop a model for compressive strength estimation of concrete using incinerated ashes as an addition	2018	University of Birmingham, Birmingham, UK	Municipal solid waste and sewage	2	Incineration	1
78	Ciarán J. Lynn, Ravindra K. Dhir, Gurmel S. Ghataora	Use of incinerated ashes as aggregate in concrete: a compressive strength model	To develop a model to estimate the compressive strength of concrete using incinerated ashes (MIBA and SSA) as aggregate	2018	University of Birmingham, UK	Municipal solid waste and sewage sludge	2	Washing, chemical, or thermal treatment
79	J. Monzó, J. Payá, M.V. Borrachero, E. Peris-Mora	Mechanical behavior of mortars containing sewage sludge ash (SSA) and Portland cements with different tricalcium aluminate content	To study the influence of sewage sludge ash (SSA) on the strength of cement mortars	1999	Valencia, Spain	Wastewater treatment	1	Incineration	1
80	J. Monzó, J. Payá, M.V. Borrachero, I. Girbés	Reuse of sewage sludge ashes (SSA) in cement mixtures: the effect of SSA on the workability of cement mortars	To clarify the workability of cement mortars containing SSA and the influence of SSA particle size	2003	Valencia, Spain	Wastewater treatment	1	Incineration	1
81	Lêda Christiane de Figueirêdo Lopes Lucena, José Fernando Thomé Juca, Jorge Barbosa Soares, Manoel Gualberto Portela	Potential Uses of Sewage Sludge in Highway Construction	Evaluate the strength behavior of the modified soil using 10% sewage sludge by weight in pavement base layers	2014	Cabanga in Recife-PE, Brazil	Wastewater treatment	1	Stabilization/Solidification
82	Huan-Lin Luo, Da-Hung Hsiao, Deng-Fong Lin, Cong-Kai Lin	Cohesive Soil Stabilized Using Sewage Sludge Ash/Cement and Nano Aluminum Oxide	To improve soft soil strength using a mixture of incinerated sewage sludge ash (SSA) and cement, with nano-Al2O3 as an additive.	2012	Kaohsiung City, Taiwan	Wastewater treatment	1	Incineration at high temperature, then ground into fine powder	1
83	Huan-Lin Luo, Deng-Fong Lin	Evaluation of Color Changes in Sewage Sludge Ash Brick by Using Image Analysis Method	Quantifying the surface color changes by digital image analysis to assess the quality of sewage sludge brick	2003	Southern Taiwan	Wastewater treatment plant	1	Incineration	1
84	Huan-Lin Luo, Deng-Fong Lin, Show-Ing Shieh, Yan-Fei You	Micro-observations of different types of nano-Al2O3 on the hydration of cement paste with sludge ash replacement	To investigate the effects of two types of nano-Al2O3 additives (MC2A and MC2R) on the hydration and properties of cement paste with sludge ash replacement.	2014	Kaohsiung City, Taiwan	Wastewater treatment	1	Calcination at 800°C for 20 hours to generate ash
85	H.L. Luo, D.F. Lin	Study the surface color of sewage sludge mortar at high temperature	Investigate surface color changes of sludge ash mortar specimens at various elevated temperatures	2007	Kaohsiung County, Taiwan	Wastewater treatment plant	1	Incinerated at 800°C for 20 hours	1
86	Minghao Liu, Yading Zhao, Yangxing Xiao, Zhenyun Yu	Performance of cement pastes containing sewage sludge ash at elevated temperatures	To investigate the effect of elevated temperature on the mechanical properties and the influencing mechanisms associated with physical, chemical, and microstructure changes of SSA blended cement pastes	2019	Harbin Institute of Technology, Harbin, China	Wastewater treatment	1	Two-stage calcination at 300°C for 2 hours and 800°C for 2 hours
87	Liqun Luo, Keyao Li, Weng Fu, Cheng Liu, Siyuan Yang	Preparation, characteristics and mechanisms of the composite sintered bricks produced from shale, sewage sludge, coal gangue powder and iron ore tailings	To investigate a way to deal with industrial wastes such as iron ore tailings, coal gangue powder, sewage sludge, and shale by using them to prepare composite sintered bricks and to determine the optimum preparation conditions.	2019	china	Wastewater treatment	1	The sewage sludge was mixed with other materials and subjected to sintering.
88	Mingwei Liu, Chunze Wang, Yang Bai, Guoren Xu	Effects of sintering temperature on the characteristics of lightweight aggregate made from sewage sludge and river sediment	Evaluate the effects of sintering temperature on the characteristics of lightweight aggregate (LWA) made from sewage sludge (SS) and river sediment (RS).	2018	Harbin, China	Wastewater treatment	1	Sewage sludge was dried, crushed, and mixed with river sediment, then sintered at various temperatures.
89	Minghao Liu, Yading Zhao, Zhenyun Yu	Effects of sewage sludge ash produced at different calcining temperatures on pore structure and durability of cement mortars	To understand the effects of sewage sludge ash (SSA) generated from different calcining temperatures on the pore structures of cement mortars, and to investigate the drying shrinkage and freezing-thawing resistance of SSA-blended cement mortars.	2021	Harbin, China	Municipal wastewater treatment	1	Calcination at different fixed temperatures (500, 600, 700, 800, and 900 ℃)
90	Qianming Lu, Shuai Zhang, Guangzhong Sun, Xueqing Wang, Shaojun Fu	Preparation of Paste Backfill Material from Mix-Calcined Sludge Ash	To investigate the effects of mixing paper mill sludge ash (PMSA) and sewage sludge ash (SSA) calcined at high temperatures to prepare backfill material for mining.	2020	Henan, China	Paper mill and sewage treatment plant	2	Calcination at high temperatures
91	Xiangguo Li, Chenhao He, Yang Lv, Shouwei Jian, Gang Liu, Wenguang Jiang, Dongbing Jiang	Utilization of municipal sewage sludge and waste glass powder in production of lightweight aggregates	To present a feasible study on the utilization of municipal sewage sludge (SS) as the principal material for the production of lightweight aggregates (LWAs) with the addition of waste glass (WG).	2020	Wuhan, China	Wastewater treatment	1	Thermal treatment around 400°C after dewatering chemically based on FeCl3 treatment and mechanically via belt presses.	1
92	Lin, D. and Weng, C.	Use of Sewage Sludge Ash as Brick Material	Investigate the use of incinerated sewage sludge ash and clay in brick manufacturing	2001	Taiwan	Wastewater	1	Incineration	1
93	Abdul G. Liew, Azni Idris, Calvin H. K. Wong, Abdul A. Samad, Megat Johari M. M. Noor, Aminuddin M. Baki	Incorporation of Sewage Sludge in Clay Brick and its Characterization	The study reports the use of sewage sludge generated from sewage treatment plants as raw material in a clay brick-making process and evaluates its effects on the physical and chemical properties of the bricks.	2004	Malaysia	sewage treatment plant	2	The sewage sludge was dried and mixed with clay in different proportions before being molded into bricks and baked.
94	Deng-Fong Lin, Huan-Lin Luo, Kuo-Liang Lin, Zhe-Kun Liu	Effects of Waste Glass and Waste Foundry Sand Additions on Reclaimed Tiles Containing Sewage Sludge Ash	To examine the compound effects of adding both WFS and waste glass to the mix of clay and SSA.	2017	Department of Civil and Ecological Engineering, I-Shou University, Kaohsiung City, Taiwan	Wastewater treatment	1	Incineration at temperatures between 800 and 1000°C, followed by grinding.	1
95	K.L. Lin, K.Y. Chiang, C.Y. Lin	Hydration characteristics of waste sludge ash that is reused in eco-cement clinkers	To evaluate the hydration characteristics of eco-cement clinkers using waste sludge ash	2005	Taiwan	Wastewater treatment sludge	1	Incineration and pulverization	1
96	Junzhe Liu, Mingfang Ba, Zhimin He, Yushun Li	Microstructure and performance of sludge-ceramisite concrete	Investigate the microstructure and performance of light-aggregate concrete prepared with ceramisite sintered from sewage sludge	2012	Ningbo, Zhejiang, China	Sewage treatment plants	2	Sintering	1
97	K.L. Lin, W.C. Chang, D.F. Lin, H.L. Luo, M.C. Tsai	Effects of nano-SiO2 and different ash particle sizes on sludge ash–cement mortar	To investigate the combined effects of different ash particle sizes and nano-SiO2 on ash–cement mortar	2008	Kaohsiung County, Taiwan, ROC	Wastewater treatment	1	Incineration at 800°C and grinding into different particle sizes	1
98	Yiming Lin, Shaoqi Zhou, Fuzhen Li, Yixiao Lin	Utilization of municipal sewage sludge as additives for the production of eco-cement	To compare the characteristics of eco-cement clinkers (made with sewage sludge substitution) with normal cement clinkers made in laboratory experiments	2012	Guangzhou, South China	Wastewater treatment	1	The sewage sludge was collected after being concentrated by centrifugation, dried at 105°C for 48 hours, and then pulverized in a ball mill until the particles could pass through a #200 mesh metallic sieve.
99	D.F. Lin, W.C. Chang, C. Yuan, H.L. Luo	Production and characterization of glazed tiles containing incinerated sewage sludge	Investigate the production and properties of glazed tiles manufactured using incinerated sewage sludge ash (ISSA) and clay	2007	Taiwan	Wastewater treatment plant	1	Incineration in a tunnel kiln at about 800°C	1
100	.F. Lin, K.L. Lin, W.C. Chang, H.L. Luo, M.Q. Cai	Improvements of nano-SiO2 on sludge/fly ash mortar	To determine the effects of nano-SiO2 additives on the properties of sludge/fly ash mortar	2007	Kaohsiung City, Taiwan	Municipal wastewater treatment plant	1	Incineration and grinding	1
101	J. Monzó, J. Payá, M.V. Borrachero, A. Cárceles	Use of Sewage Sludge Ash (SSA)-Cement Admixtures in Mortars	Study the influence of SSA on the strength and workability of mortars	1996	Valencia, Spain	Wastewater treatment plant	1	Incineration to produce ash	1
102	Yujie Huang, Ziwei Chen, Yunpeng Liu, Jian-Xin Lu, Zuwang Bian, Marcus Yio, Christopher Cheeseman, Fazhou Wang, Chi Sun Poon	Recycling of waste glass and incinerated sewage sludge ash in glass-ceramics	To recycle waste glass and ISSA together to form value-added glass-ceramics	2024	Hong Kong, China, UK	Wastewater treatment	1	Incineration	1
103	Martin Cyr, Marie Coutand, Pierre Clastres	Technological and environmental behavior of sewage sludge ash (SSA) in cement-based materials	The main objective is to evaluate the physical, chemical, and mineralogical characteristics of SSA, assess its effect on mortar properties, and examine its environmental impact.	2007	Toulouse, France	Wastewater treatment	1	Fluidized bed combustion at 850°C
104	Xujiang Wang, Haohao Wang, Ziliang Zhang, Jingwei Li, Hongzhi Zhang, Wenlong Wang, Yanpeng Mao, Zhanlong Song	Calcination of sewage sludge-based sulphoaluminate cement clinker: Mineral formation mechanism and heavy metal transition behaviors	To study the effects of sewage sludge addition on the calcination of sulphoaluminate cement clinker and the transformation of heavy metals	2023	Jinan, Shandong, China	Wastewater treatment	1	Drying and pulverization	2
105	Arun Kumar Prabhakar, Padmaja Krishnan, Serina Siew-Chen Lee, Chin Sing Lim, Anjaneya Dixit, Babu Cadiam Mohan, Jia Heng Teoh, Sze Dai Pang, Daniel C.W. Tsang, Serena Lay-Ming Teo, Chi-Hwa Wang	Sewage sludge ash-based mortar as construction material: Mechanical studies, macrofouling, and marine toxicity	To evaluate the use of sewage sludge ash as a partial substitute for cement and aggregate in mortar blocks, and to test their mechanical properties, macrofouling, and marine toxicity.	2022	Singapore	Wastewater treatment	1	Incineration at 750 °C, followed by ball milling for cement substitution and direct use as aggregate.	1
106	Anđelina Bubalo, Dražen Vouk, Lidija Ćurković, Marko Rogošić, Domagoj Nakić, Christopher Cheeseman	Influence of combustion temperature on the performance of sewage sludge ash as a supplementary material in manufacturing bricks	To investigate the influence of the combustion temperature of sewage sludge (SS) on the properties of sewage sludge ash (SSA) bricks and assess the suitability of SSA as a supplementary material in brick production.	2023	Zagreb and Karlovac, Croatia	Wastewater treatment	1	Sewage sludge was collected from wastewater treatment plants, anaerobically digested, mechanically dewatered, dried, and then combusted at 800, 900, and 1000 °C.
107	Hongyu Gao, Kai Zhou, Di Su, Biwu Zhang, Fangqin Cheng	Sludge-based baking-free brick prepared by sewage sludge with high moisture content: Influence of process parameters and environmental risk assessment	To study the effects of process parameters on the properties of sludge-based baking-free bricks and evaluate the environmental risks	2022	Shanxi University, Taiyuan, China	Sewage treatment plant	2	Chemical conditioning followed by mixing with solid wastes	4
108	Hassan Al Nageim, Anmar Dulaimi, Shakir Al-Busaltan, Mustafa Amoori Kadhim, Aaraf Al-Khuzaie, Linda Seton, Jennifer Croft, Jonathan Drake	The development of an eco-friendly cold mix asphalt using wastewater sludge ash	Develop a sustainable and ecologically sound cold mix asphalt (CMA) incorporating wastewater sludge fly ash (UFA) and bottom ash (UBA) as replacement fillers for ordinary Portland cement and limestone. Examine the mechanical and durability characteristics of the new CMAs.	2023	Liverpool John Moores University, Liverpool, UK; University of Warith Al-Anbiyaa, Karbala, Iraq; University of Kerbala, Karbala, Iraq; United Utilities Water Limited, Warrington, UK	Wastewater treatment	1	Wastewater sludge is dewatered and incinerated at 800–900°C to produce fly ash and bottom ash
109	Lisbeth M. Ottosen, Dines Thornberg, Yariv Cohen, Sara Stiernström	Utilization of acid-washed sewage sludge ash as sand or cement replacement in concrete	To investigate the use of acid-washed sewage sludge ash (AW-SSA) from the Ash2Phos process in concrete as partly sand or cement replacement.	2022	Copenhagen, Denmark	Wastewater treatment plant	1	Acid wash for P recovery using the Ash2Phos process developed by EasyMining	4
110	Zhiyang Chang, Guangcheng Long, Youjun Xie, John L. Zhou	Pozzolanic reactivity of aluminum-rich sewage sludge ash: Influence of calcination process and effect of calcination products on cement hydration	To investigate the influence of calcination process on physicochemical characteristics and pozzolanic activity of aluminum-rich sludge ash and study the effect of sludge ash on cement hydration.	2022	Changsha, Hunan, China; Sydney, NSW, Australia	Wastewater treatment plant	1	Calcination at different temperatures (600℃, 700℃, 800℃, 900℃) with air or water cooling.
111	Zhiyang Chang, Guangcheng Long, Youjun Xie, John L. Zhou	Chemical effect of sewage sludge ash on early-age hydration of cement used as supplementary cementitious material	To investigate the chemical effect of sewage sludge ash on early-age hydration of cement	2022	Changsha, Hunan, China; Sydney, NSW, Australia	Wastewater treatment	1	Incineration at 600°C and 800°C	1
112	Regina Kalpokaite-Dickuviene, Inna Pitak, Arunas Baltusnikas, Stase Irena Lukosiute, Gintaras Denafas, Jurate Cesniene	Cement substitution by sludge-biomass gasification residue: Synergy with silica fume	Evaluate the possible application of residue derived from industrial sewage sludge-biomass gasification plants, with silica fume as a partial binder substitute in cement-based materials	2022	Kaunas, Lithuania	Industrial sewage sludge	2	Gasification	4
113	Xiaolu Guo, Shuting Yuan, Yunfeng Xu, Guangren Qian	Effects of phosphorus and iron on the composition and property of Portland cement clinker utilized incinerated sewage sludge ash	The influence of phosphorus and iron on the mineral composition and hydration property of Portland cement clinker utilizing incinerated sewage sludge ash (ISSA).	2022	Shanghai, PR China	Wastewater treatment	1	Incineration	1
114	Shulai Guo, Rongzhen Dong, Zhiyang Chang, Youjun Xie, Gege Chen, Guangcheng Long	Performance and microstructure of sustainable cementitious materials mixed by municipal sewage sludge ash, slag, and fly ash	To explore methods to improve the performance of sludge ash–cement materials and investigate key properties, particularly durability, typical municipal sewage sludge ash with high content Al from Changsha’s West Municipal Sewage Treatment Plant, Hunan Province, China was used.	2023	Changsha, Hunan Province, China	Municipal wastewater treatment ​​	1	Incineration to obtain sewage sludge ash with high pozzolanic activity	1
115	Xiaobing Ma, Daquan Shi, Yan Xia, Yading Zhao, Minghao Liu, Yingzi Yang	Controllable setting time of alkali-activated materials incorporating sewage sludge ash and GGBS: The role of retarders	To control the setting time of SAAM by employing retarders and evaluate their impact on setting time, fluidity, compressive strength, and sustainability.	2024	Harbin, China	Wastewater treatment	1	Drying at 300°C followed by burning in a muffle furnace at 800°C.	2
116	Obinna Onuaguluchi, Badr Mohamed, Adib Adwan, Loretta Li, Nemkumar Banthia	Sludge-derived biochar as an additive in cement mortar: Mechanical strength and life cycle assessment (LCA)	Investigate the use of sludge-derived biochar as an additive in cement mortar and assess its mechanical strength and environmental impacts through life cycle assessment	2024	University of British Columbia, Canada; Cairo University, Egypt	Wastewater treatment plant	1	Pyrolysis at 500°C in an N2 or CO2 environment
117	Yinxue Li, Xiaolu Guo	Coupling evaluation of carbon emissions and strength: Early carbonation curing of cement mortar containing incinerated sewage sludge ash (ISSA)	To explore the application of ISSA as SCMs for cement production through early carbonation curing, reducing carbon emissions.	2024	Shanghai, China	Wastewater treatment	1	Dehydrated, dried, incinerated in a fluidized bed furnace at 850 ℃-900 ℃	2
118	Tao Ding, Kaige Shen, Chen Cai, Jianzhuang Xiao, Xuwen Xiao, Wan Liang	3D printed concrete with sewage sludge ash: Fresh and hardened properties	To explore the application of sewage sludge ash (SSA) in 3D printed concrete (3DCP) technology and investigate its impact on workability, printability, and mechanical properties of 3DCP	2024	Shanghai, China	Industrial and municipal sludge	2	Incineration of leather sludge and municipal sludge	1
119	Piotr Górak, Przemysław Postawa, Lidia Natalia Trusilewicz, Aleksandra Kalwik	Cementitious eco-composites and their physicochemical/mechanical properties in Portland cement-based mortars with a lightweight aggregate manufactured by upcycling waste by-products	To assess the physicochemical and mechanical properties of cement composites with composite lightweight aggregates (CLAs) made from waste by-products	2021	Poland	Industrial (sewage sludge fly ash)	2	Thermal synthesis	1
120	Juntao Dang, Lukai Hao, Jianzhuang Xiao, Tao Ding	Utilization of excavated soil and sewage sludge for green lightweight aggregate and evaluation of its influence on concrete properties	To explore the effect of particle size and replacement level of LWA-ES on the concrete performance and its physical characteristics.	2023	Department of Structural Engineering, Tongji University, Shanghai, PR China; School of Civil Engineering and Communication, North China University of Water Resources and Electric Power, Zhengzhou, PR China	Wastewater treatment	1	Sintering	1
121	A.S. Liu, W. Li, C.Y. Kwok	Low carbon stabilization of Hong Kong marine deposits by sewage sludge ash for land reclamation	To recycle dredged marine deposits as fill material and replace cement with sewage sludge ash (SSA) to reduce carbon footprint	2024	Hong Kong Special Administrative Region	Sewage treatment plants	2	Incineration (sewage sludge ash)	1
122	Diego López Barreiro, Francisco J. Martin-Martinez, Shengfei Zhou, Ixone Sagastagoia, Francisco del Molino Pérez, Francisco Javier Arrieta Morales, Markus J. Buehler	Biobased additives for asphalt applications produced from the hydrothermal liquefaction of sewage sludge	Investigate the valorization of sewage sludge into biocrude oils using hydrothermal liquefaction (HTL) for potential applications as green additives for asphalt binder.	2022	Bens (A Coruña), Spain	Wastewater treatment	1	Hydrothermal liquefaction
123	K.S. Mojapelo, W.K. Kupolati, J.M. Ndambuki, E.R. Sadiku, I.D. Ibrahim	Utilization of wastewater sludge for lightweight concrete and the use of wastewater as curing medium	To evaluate the use of wastewater sludge as a replacement for sand in concrete and the use of wastewater as a curing medium	2021	Polokwane Waste Water Treatment Works (WWTW) in Limpopo Province, South Africa	Wastewater treatment	1	Air-dried and crushed until passing through a 4.75 mm sieve	2
124	Bin Li, Wenjiao Zhang, Xiaohong Fang, Xiangqing Kong, Fan Liu, Gongjie Li	Coupling effects of sewage sludge and recycled fine aggregate on the properties of geopolymer recycled mortars	Investigate the workability, mechanical performance, and microstructure of GGBFS and sewage sludge ash (SSA) based alkali activated GRM	2024	China	Wastewater treatment	1	Drying, crushing, calcination, and screening	2
125	Pitchiah Raman Shunmuga Vembu, Arun Kumar Ammasi	Strength and durability of dry sewage sludge (DSS) as a replacement for fine aggregates	To investigate the mechanical and durability properties of concrete incorporating dry sewage sludge (DSS) as a replacement for fine aggregates.	2022	Chennai, Tamil Nadu, India	Municipal sewage treatment plant	2	Drying	2
126	S. Naamane, M. Saidi Hassani Alaoui, M. Taleb, K. Haboubi, Z. Rais	Leachability of cement mortars containing sewage sludge ash	To investigate the leachability of cement-based mortars containing sewage sludge ash (SSA) and assess the environmental behavior and leachability of these cement mixtures.	2022	Fez, Morocco	Wastewater treatment plant treating industrial wastewater	1	Incineration at 700°C in an electrical muffle	1
127	T. Charles Mahutjane, Léonel N. Tchadjié, Thandiwe N. Sithole	The feasibility of utilizing sewage sludge as a source of aluminosilicate to synthesise geopolymer cement	To evaluate the feasibility of utilizing sewage sludge as a source of aluminosilicate to synthesize geopolymer cement.	2023	Polokwane, Limpopo Province, South Africa	Wastewater treatment	1	Calcination at various temperatures (550, 650, 750, 850 °C)
128	Zhiyang Chang, Guangcheng Long, Youjun Xie, John L. Zhou	Recycling sewage sludge ash and limestone for sustainable cementitious material production	To investigate the synergistic effect of partially replacing cement by sewage sludge ash and limestone for sustainable cementitious material production.	2022	Changsha, Hunan, China	Wastewater treatment	1	Sludge was collected, dried at 105°C for 24 hours, homogenized by a crusher, and calcined at 800°C for 4 hours.
129	Sarah Hashim Mohammed, Khitam Abdulhussein Saeed, Hasan Ibrahim Al Shaikhli	Evaluation of the strength and microstructural characteristics of stabilized organic clay soil	To assess the strength of organic clay soil stabilized with sewage sludge and cement, exploring the synergistic effects of these stabilizing agents.	2024	The soil used in the experiment came from the Alkraiat region, north of Baghdad. The sewage sludge was obtained from Rostomya in Baghdad.	Wastewater treatment	1	Sewage sludge introduced at varying percentages, blended with soil, and treated with cement at different dry weight ratios.
130	D. Vouk, D. Nakic, N. Stirmer, and C. R. Cheeseman	Use of Sewage Sludge Ash in Cementitious Materials	To review the potential for using sewage sludge ash (SSA) in cement mortars and concrete	2017	Croatia and UK (specifically the University of Zagreb and Imperial College London)	Wastewater treatmen	1	Incineration	1
131	S. Naamane, Z. Rais, M. Taleb, N.H. Mtarfi, M. Sfaira	Sewage sludge ashes: Application in construction materials	To study the waste material obtained from the incineration of sewage sludge at 700 °C under controlled conditions and their influence on strength and workability of cement-based mortars	2016	Fez, Morocco	Industrial wastewater treatment	2	Incineration at 700 °C	1
132	Samaa Ali Hassooni, Saleem Ethaib	Evaluation the Effect of Reuse Sewage Sludge and Sewage Sludge Ash on Concrete for Cement Replacement	To evaluate the effect of reuse sewage sludge and sewage sludge ash on concrete for cement replacement	2020	Al-Rustamiyah Wastewater Treatment Plant, Baghdad, Iraq	Wastewater treatment	1	Sun dried sewage sludge (DSS) and sewage sludge ash (SSA) produced by incineration at 600°C for 2 hours
133	E. G.ª Alcocel, P. Garcés, J. J. Martínez, J. Payá, L. G.ª Andión	Effect of sewage sludge ash (SSA) on the mechanical performance and corrosion levels of reinforced Portland cement mortars	To provide scientific data on the kinetics of corrosion in steel bars embedded in Portland cement mortars containing SSA	2006	Pineda, Valencia	Wastewater treatment	1	Incineration	1
134	E. G.ª Alcocel, P. Garcés, J. J. Martínez, J. Payá, L. G.ª Andión	Effect of sewage sludge ash (SSA) on the mechanical performance and corrosion levels of reinforced Portland cement mortars	To determine the corrosion levels in reinforced mortars with different percentages of sewage sludge ash (SSA) admixtures	2006	Valencia, Spain	Wastewater treatment	1	Incineration	1
135	S. Naamane, Z. Rais, M. Lachquar, M. Taleb	Characterization of calcined sewage sludge for its incorporation in cement	To study the impact of a thermal treatment on sewage sludge for its reuse in cement manufacturing	2014	Fez, Morocco	Wastewater treatment plant (activated sludge method)	1	Thermal treatment (calcination)	1
136	Bui Le Anh Tuan, Mewael Gebregiorgis Tesfamariam, Yuan-Yuan Chen, Chao-Lung Hwang, Kae-Long Lin, Mung-Pei Young	Production of Lightweight Aggregate from Sewage Sludge and Reservoir Sediment for High-Flowing Concrete	To utilize the feasibility of lightweight aggregate (LWA) produced from waste and its application in lightweight concrete (LWC).	2014	Taiwan	Wastewater treatment	1	Sintering at temperatures between 1,050–1,250°C	1
137	Horiguchi, T., Fujita, R., and Shimura, K.	Applicability of Controlled Low-Strength Materials with Incinerated Sewage Sludge Ash and Crushed-Stone Powder	To evaluate the applicability of new controlled low-strength materials (CLSM) that include incinerated sewage sludge ash and crushed-stone powder.	2011	Sapporo, Japan	Municipal wastewater treatment	1	Incineration	1
138	['T. D. Dyer, J. E. Halliday, R. K. Dhir']	['Hydration Chemistry of Sewage Sludge Ash Used as a Cement Component']	['The hydration chemistry of sewage sludge ashes (SSAs) used as cement components is examined.']	[2011]	['United Kingdom']	['Wastewater treatment']	1	['Incineration']	1
139	Maria P. Durante Ingunza, Kiev Luiz de Araújo Pereira, Olavo Francisco dos Santos Junior	Use of Sludge Ash as a Stabilizing Additive in Soil-Cement Mixtures for Use in Road Pavements	Evaluating the use of sludge ash as a stabilizing additive to soil-cement mixtures for use in base and subbase road pavements	2015	Brazil (Northeastern coast)	Sewage treatment plant	2	Incineration to produce sludge ash	1
140	Ping Chen, Bin Feng, Yunjie Lin, Cheng Lin	Solidification and Stabilization of Sewage Sludge and MSWI Bottom Ash for Beneficial Use as Construction Materials	To investigate the feasibility of converting municipal sewage sludge and municipal solid waste incineration (MSWI) bottom ash to a construction material for the dikes of a sludge-only containment	2019	Chengdu City, Sichuan Province, China	Municipal sewage sludge (wastewater treatment)	2	Solidification and stabilization by various binders including Portland cement, lime, gypsum, and a combination of some of these binders
141	Jiang-shan Li, Ph.D.; Yi-fan Zhou, Ph.D.; Qi-ming Wang, Ph.D.; Qiang Xue, Ph.D.; and Chi Sun Poon, Ph.D.	Development of a Novel Binder Using Lime and Incinerated Sewage Sludge Ash to Stabilize and Solidify Contaminated Marine Sediments with High Water Content as a Fill Material	To develop a new technique for treating contaminated marine sediments using lime and incinerated sewage sludge ash (ISSA) as binders to produce construction materials for use as road bases or engineering fills.	2019	Hong Kong	Wastewater treatment	1	Incineration	1
142	Andrey Panferov, Grigory Ivakhniuk, Alexandr Garabadzhiu	Physico-Chemical Properties and Possible Applications of Sewage Sludge Combustion Ash	Study of physical and chemical properties of ash from the combustion of sewage sludge and its possible applications in construction and agriculture	2021	Saint Petersburg, Russia	Wastewater treatment plant sludge	1	Combustion in fluidised bed Pyrofluid furnaces
143	['D. Djafari, A. Semcha, R. Zentar, B. Mekerta, A. Touzi, H. Hannache, M. Elharti, A. Zarrouk']	['Characterization and valorisation of sludge of wastewater treatment plant (WWTPs) into cement industry']	['Valorizing the ashes sludge of wastewater treatment plants for the production of green-cement']	[2017]	['Sidi Bel Abbes, Algeria']	['Wastewater treatment']	1	['Heat treatment (calcification at 550°C)']	1
144	Mohammed H. Al Sayed, Ismail M. Madany, A. Rahman M. Buali	Use of sewage sludge ash in asphaltic paving mixes in hot regions	Investigate the utilization of sewage sludge ash as a replacement for mineral filler in asphaltic paving mixtures in hot regions.	1995	Bahrain	Wastewater treatment	1	Sewage sludge was stored outdoors in dry beds for at least 12 months, heated to approximately 500°C to remove organic matter, then crushed, ground, and sieved to the desired size.
145	R. Khanbilvardi and S. Afshari	Sludge Ash as Fine Aggregate for Concrete Mix	Determine the feasibility of using sludge ash as a substitute for a portion of fine aggregates in concrete.	1995	Bergen Point Wastewater Treatment Plant, Long Island, NY	Wastewater treatment	1	Incineration	1
146	J. Latosińska, M. Żygadło	The application of sewage sludge as an expanding agent in the production of lightweight expanded clay aggregate mass	To determine the effect of sewage sludge on the physical and operational parameters of the sinter	2011	Kielce, Poland	Municipal sewage treatment plant	2	Drying	2
147	Zhen Chen, Chi Sun Poon	Comparing the use of sewage sludge ash and glass powder in cement mortars	Explore the suitability of using sewage sludge ash (SSA) and mixed-colored glass powder (MGP) as construction materials	2016	Hong Kong	Wastewater treatment (sewage sludge)	1	Incineration (dewatering by centrifugation, incineration, and collection by dust removal system)	1
148	Regina Kalpokaitė-Dičkuvienė, Irena Lukošiūtė, Kristina Brinkienė, Nerijus Striūgas, Arūnas Baltušnikas, Raimonda Lukauskaitė, Jūratė Čėsnienė ​​	Utilization of sewage sludge-biomass gasification residue in cement-based materials: effect of pozzolant type ​​	To investigate the viability to utilize the residue from sewage sludge and biomass combustion/gasification plant in cement-based materials by using pozzolanic materials to enhance recyclability ​​	2017 ​​	Lithuanian Energy Institute (LEI), Kaunas, Lithuania ​​	Wastewater treatment ​	1	Thermal treatment (combustion/gasification) ​​	1
149	Marko Gerić, Goran Gajski, Višnja Oreščanin, Robert Kollar, Vera Garaj-Vrhovac	Chemical and toxicological characterization of the bricks produced from clay/sewage sludge mixture	Characterize chemical properties of clay bricks containing 20% sewage sludge and evaluate the leaching of heavy metals and their impact on human cells.	2012	Zagreb, Croatia	Municipal wastewater treatment	1	Biological treatment of municipal waste water	3
150	Khotamy Saphongxay, Chakrapan Tuakta, Oratai Jongprateep	Industrial Wastewater Sludge as Potential Filler Materials for Fabrication of Lightweight Concrete Blocks	Examining potential utilization of industrial sludge in fabrication of lightweight concrete blocks	2021	Kasetsart University, Bangkok, Thailand	Industrial wastewater treatment plant	2	Drying and grinding	2
151	M. Jamshidi, A. Jamshidi, N. Mehrdadi	Application of Sewage Dry Sludge in Concrete Mixtures	To evaluate the effects of adding the dry sludge of Alborz Industrial/domestic sewage treatment plant to mass concrete.	2011	Alborz (Qazvin), Iran	Industrial/domestic wastewater treatment	2	Heat treatment	1
152	M. Anderson and R. G. Skerratt	Variability study of incinerated sewage sludge ash in relation to future use in ceramic brick manufacture	To establish that the quality of incinerated sewage sludge ash (ISSA) is consistent over time for use in brick manufacture	2003	A large modern commercial sewage sludge incinerator in the UK	Wastewater treatment	1	Incineration	1
153	Janetta Balgaranova, Assen Petkov, Liliana Pavlova, Elena Alexandrova	Utilization of Wastes from the Coke-Chemical Production and Sewage Sludge as Additives in the Brick-Clay	Investigate the possibility of combined utilization of sludge from the Sofia wastewater treatment plant and waste products from coke-chemical production as additives to brick clay	2003	Sofia, Bulgaria	Wastewater treatment plant in Sofia	1	Combined with waste products from coke-chemical production	2
154	brahim Alhassan, Junboum Park, and Xiaochao Tang	Characterizing a Local Sewage Sludge Ash for Developing Alkali-Activated Geopolymer Mortar	To characterize a local sewage sludge ash as a precursor to develop geopolymer mortar	2023	Chester, Pennsylvania, USA	Wastewater treatment facilities	1	Incineration	1
155	Mithesh Kumar, Shreelaxmi Prashant	Durability and Ecological Evaluation of Structural Concrete with Sewage Sludge Ash as Ternary Binder	To investigate the mechanical strength and durability characteristics of SSA as a substitute for binders in high-strength and high-volume flyash concrete.	2024	Manipal Academy of Higher Education, India	Wastewater treatment plants	1	Incineration of sewage sludge	1
156	Brett Q. Tempest, Miguel A. Pando	Characterization and Demonstration of Reuse Applications of Sewage Sludge Ash	To investigate and demonstrate potential reuse applications for sewage sludge ash (SSA) produced by a wastewater treatment plant in the Southeastern United States.	2013	Southeastern United States	Wastewater treatment	1	Incineration	1
157	M. Coutand, M. Cyr, and P. Clastres	Use of sewage sludge ash as mineral admixture in mortars	Evaluate the potential of sewage sludge ash (SSA) as a mineral admixture in cement-based materials	2006	Toulouse, France	Wastewater treatment	1	Incineration of sewage	1
158	E. G.ª Alcocel, P. Garcés, J. J. Martínez, J. Payá, L. G.ª Andión	Effect of sewage sludge ash (SSA) on the mechanical performance and corrosion levels of reinforced Portland cement mortars	To evaluate the effect of sewage sludge ash on the mechanical performance and corrosion levels of reinforced Portland cement mortars	2006	Not explicitly mentioned, inferred to be Spain	Wastewater treatment	1	Incineration of sewage	1
159	Shao-Hua Hu, Shen-Chih Hu, Yen-Pei Fu	Recycling technology: Artificial lightweight aggregates synthesized from sewage sludge and its ash at lowered co-melting temperature	To investigate artificial lightweight aggregates (ALWAs) synthesized from industrial waste such as sewage sludge and sewage-sludge-derived ash using Na2CO3 to produce the required viscous glassy phase at a lower co-melting temperature.	2012	Taiwan	Wastewater treatment plant	1	Preheating and sintering with sodium carbonate	1
161	K. Moulato, M. Ammari, L. Ben Allal	Performance of sewage sludge reuse in the manufacturing of fired bricks	Evaluate the properties of bricks made from sewage sludge, aiming to innovate effective elimination of urban sludge	2023	Tangier, Morocco	Wastewater treatment plant	1	Dehydration, air drying, and storage in closed containers at 4°C to minimize bacterial activity	2
										(MnO)
162	Nurul Salhana Abdul Salim, Aeslina Abdul Kadir, Mohd Hafizul Fadzli Zaidi, Mohamad Asyraf Kamarudin	Incorporation of Sludge from Wastewater Treatment Plant in Fired Clay Brick: Properties and Leaching Analysis	Investigate the reusability of sewage sludge as fired clay brick.	2019	Johor, Malaysia	Wastewater treatment	1	Dried for 24 hours at 105°C in the oven before crushing.	2	0.06%
163	Gulgun Dede, Ayse Bengu Sunbul, Mirac Gedikli	Investigation of Waste Foundry Sand and Sewage Sludge Reuse as Landfill Cap Layer Material	To obtain the usability of waste foundry sand with sewage sludge as landfill cap layer material.	2020	Sakarya, Turkey	Wastewater treatment	1	Dewatered and stabilized	2
164	Ching-Ho Chen, Ing-Jia Chiou, Kuen-Sheng Wang	Sintering effect on cement bonded sewage sludge ash	To study how the use of sewage sludge ash (SSA) improved the thermal properties and sintering effects of cement-base materials, and to evaluate the feasibility of using SSA to improve the soundness of cement-base materials under high temperature.	2006	Ming-Shen Wastewater Treatment Plant, Taipei, Taiwan	Wastewater treatment	1	Fired in a pilot scale incinerator at 900 °C for 3 hours	1
165	S. Donatello, A. Freeman-Pask, M. Tyrer, C.R. Cheeseman	Effect of milling and acid washing on the pozzolanic activity of incinerator sewage sludge ash	To investigate the pozzolanic activity and crystalline phase chemistry of ISSA before and after acid washing to remove phosphate.	2010	Centre for Environmental Control and Waste Management, Department of Civil and Environmental Engineering, Skempton Building, Imperial College London, London SW7 2AZ, UK	Industrial (incinerator sewage sludge ash)	2	Milling and acid washing	4
166	Priscilla de Azevedo Basto, Holmer Savastano Junior, Antonio Acacio de Melo Neto	Characterization and pozzolanic properties of sewage sludge ashes (SSA) by electrical conductivity	To study the pozzolanic activity of sewage sludge ash (SSA) as a supplementary cementitious material (SCM) and evaluate its properties and potential applications in cementitious composites	2019	Mangueira Wastewater Treatment Plant, Recife, Brazil	Wastewater treatment plant	1	Controlled incineration at temperatures ranging from 600-900 °C	1
167	D. Eliche-Quesada, C. Martínez-García, M.L. Martínez-Cartas, M.T. Cotes-Palomino, L. Pérez-Villarejo, N. Cruz-Pérez, F.A. Corpas-Iglesias	The use of different forms of waste in the manufacture of ceramic bricks	To investigate the incorporation of various industrial wastes with clay to produce bricks and analyze their effects on physical, mechanical, and thermal properties.	2011	Linares (Jaén), Spain	Wastewater treatment plant.	1	Stabilization through biological or physical–chemical treatment, followed by dehydration (drying).	1,2,3,4
168	L. Chen, D.F. Lin	Applications of sewage sludge ash and nano-SiO2 to manufacture tile as construction material	To investigate the effect of introducing nano-SiO2 particles as strengthening additives in clay-ISSA materials.	2009	Kaohsiung County, Taiwan, ROC	Wastewater treatment	1	Incineration	1
169	Olga Kizinievič, Ramunė Žurauskienė, Viktor Kizinievič, Rimvydas Žurauskas	Utilisation of sludge waste from water treatment for ceramic products	To determine the influence of drinking water treatment sludge on physical and mechanical properties, structural parameters, mineralogical composition of the ceramic body	2013	Vilnius, Lithuania	Water treatment	1	Aeration and filtration through open filters with quartz sand	5
170	Beatriz González-Corrochano, Jacinto Alonso-Azcárate, Luis Rodríguez, Agripino Pérez Lorenzo, María Fernández Torío, Juan José Tejado Ramos, María Dolores Corvinos, Carlos Muro	Valorization of washing aggregate sludge and sewage sludge for lightweight aggregates production	To demonstrate the viability of recycling two types of wastes to develop artificial lightweight aggregates with adequate properties for different sectors.	2016	Spain	Wastewater treatment plant	1	Dewatering and stabilization, followed by drying at room temperature and in an oven.	2
171	P.C. Lau, D.C.L. Teo, M.A. Mannan	Characteristics of lightweight aggregate produced from lime-treated sewage sludge and palm oil fuel ash	Investigate the characteristics of lightweight aggregate made from solid waste such as lime-treated sewage sludge, palm oil fuel ash, and sodium silicate.	2017	Universiti Malaysia Sarawak, Malaysia	Wastewater treatment	1	Lime treatment	4
172	Zhen Chen, Chi Sun Poon	Comparative studies on the effects of sewage sludge ash and fly ash on cement hydration and properties of cement mortars	The study identified the mechanisms behind some beneficial effects of the SSA on the strength development of mortars through a comparison study with fine sewage sludge ash (FSSA) and pulverized fly ash (PFA).	2017	Hong Kong	Wastewater treatment	1	Incineration	1
173	Yuchi Chen, Teng Wang, Min Zhou, Haobo Hou, Yongjie Xue, Hao Wang	Rice husk and sewage sludge co-combustion ash: Leaching behavior analysis and cementitious property	Investigate the leaching behavior and metals speciation of ashes from the co-combustion of rice husk and sewage sludge and propose the potential resource utilization of ashes	2018	Wuhan, China	Wastewater treatment	1	Co-combustion with rice husk	1
174	Maria del Pilar Durante Ingunza, Gladis Camarini, Felipe Murilo Silva da Costa	Performance of mortars with the addition of septic tank sludge ash	To study the performance of mortars with the addition of septic tank sludge ash (SA).	2018	Federal University of Rio Grande do Norte, Natal, RN, Brazil; University of Campinas, Cidade Universitária Zeferino Vaz, Brazil	Septic tank sludge	4	Calcination at 850°C to eliminate water, organic matter, and pathogenic microorganisms.	1
175	Ertugrul Esmeray, Mustafa Atıs	Utilization of sewage sludge, oven slag and fly ash in clay brick production	Evaluation of sewage sludge in the construction sector	2019	Bursa, Bartın Province, Karabük, Turkey	Wastewater treatment	1	Sun drying followed by drying at 105 ± °C and sieving to less than 1 mm	2
176	Chin-Wei Hsu, Chun-Tao Chen	Strength development of cement pastes with alkali-activated dehydrated sewage sludge	To investigate the fresh properties and strength developments of cement pastes with HDSS by various alkali-activated cement binders	2020	Taipei, Taiwan	Wastewater treatment plants	1	Indirect heating at 200°C for 6 hours (Dihua Sewage Treatment Plant)	1
177	Chai Yee Ching, Mohammed J.K. Bashir, Ng Choon Aun, M.A.A. Aldahdooh	Sustainable production of concrete with treated alum sludge	Investigate the effect of replacing cement by alum sludge on the performance of normal concrete	2021	Universiti Tunku Abdul Rahman, Kampar, Perak, Malaysia	Wastewater treatment	1	Oven drying at 105 ± 5℃ for 24 hours	1
178	Sumit Chakraborty, Byung Wan Jo, Jun Ho Jo, Zafar Baloch	Effectiveness of sewage sludge ash combined with waste pozzolanic minerals in developing sustainable construction material: an alternative approach for waste management	Utilization of the sewage sludge ash in fabricating the construction material would be an effective alternative approach under the sludge management scheme other than landfilling.	2017	Hanyang University, Seoul, South Korea	Sewage treatment plant	2	Incineration	1
179	Jiang-Shan Li, Ming-Zhi Guo, Xue Qiang, Chi Sun Poon	Recycling of incinerated sewage sludge ash and cathode ray tube funnel glass in cement mortars	To explore the feasibility of using cement blended with ISSA as cementitious materials in the production of cement mortars using recycled CRT glasses as fine aggregates.	2017	Hong Kong	Wastewater treatment	1	Incineration	1
180	Zhen Chen, Jiang Shan Li, Chi Sun Poon	Combined use of sewage sludge ash and recycled glass cullet for the production of concrete blocks	Investigate the properties of concrete blocks using SSA as a cement replacement together with recycled construction and demolition aggregates or glass cullet.	2017	Hong Kong	Wastewater treatment	1	Incineration	1
181	Xinyu Cong, Shuang Lu, Yunhe Gao, Yan Yao, Mohamed Elchalakani, Xianming Shi	Effects of microwave, thermomechanical and chemical treatments of sewage sludge ash on its early-age behavior as supplementary cementitious material	To better inform the recycling of sewage sludge ash (SSA) in cement-based construction materials, this laboratory study investigated a variety of modification methods aimed at improving the value of SSA.	2020	Harbin, China	Wastewater treatment	1	Microwave treatment, Thermomechanical treatment, Chemical modification	1
182	Chunping Gu, Yongjie Ji, Yurong Zhang, Yang Yang, Jintao Liu, Tongyuan Ni	Recycling use of sulfate-rich sewage sludge ash (SR-SSA) in cement-based materials: Assessment on the basic properties, volume deformation and microstructure of SR-SSA blended cement pastes	Investigate the possibility of recycling sulfate-rich sewage sludge ash (SR-SSA) in cement-based materials and its effects on the basic properties, volume deformation, and microstructure of cement paste.	2020	Zhejiang University of Technology, Hangzhou, China	Wastewater treatment	1	Incineration	1
183	Li Chen, Deng-Fong Lin	Stabilization treatment of soft subgrade soil by sewage sludge ash and cement	To use incinerated sewage sludge ash (ISSA) mixed with cement as a stabilizer to improve the strength of soft, cohesive, subgrade soil.	2009	Kaohsiung County, Taiwan, ROC	Wastewater treatment	1	Incineration	1
184	Carlos Barrera-Díaz, Gonzalo Martínez-Barrera, Osman Gencel, Lina A. Bernal-Martínez, Witold Brostow	Processed wastewater sludge for improvement of mechanical properties of concretes	To address the utilisation of sludge from the treatment of wastewater and the modification of the mechanical properties of concrete	2011	Mexico and Turkey	Wastewater treatment	1	Chemical treatment with coagulants (ferrous sulphate, aluminium sulphate, aluminium polyhydroxychloride) and electrochemical treatment	4
185	I. O. R. Areias, C. M. F. Vieira, H. A. Colorado, G. C. G. Delaqua, S. N. Monteiro, A. R. G. Azevedo	Could city sewage sludge be directly used into clay bricks for building construction? A comprehensive case study from Brazil	Investigate the practical firing temperature and maximum sewage sludge content for optimal cost/technical benefit fabrication of clay bricks	2020	Campos dos Goytacazes, Brazil	Municipal wastewater treatment	1	Sequential treatment in anaerobic reactor, anoxic filter, biodrum filter, secondary/tertiary decanters, and inertization with Ca(OH)2	4
186	C.R. Cheeseman, G.S. Virdi	Properties and microstructure of lightweight aggregate produced from sintered sewage sludge ash	Characterize the properties and microstructure of lightweight aggregate produced by pelletizing and sintering sewage sludge ash	2005	Beckton sludge incinerator, London, UK	Wastewater treatment	1	Sintering	1
187	Ing-Jia Chiou, Kuen-Sheng Wang, Ching-Ho Chen, Ya-Ting Lin	Lightweight aggregate made from sewage sludge and incinerated ash	To study the influences of raw material composition on pelletising, sintering effect and aggregate properties using sewage sludge ash and sewage sludge.	2006	Taiwan	Wastewater treatment	1	Incineration and sintering	1
188	P. Garcés, M. Pérez Carrión, E. García-Alcocel, J. Payá, J. Monzó, M.V. Borrachero	Mechanical and physical properties of cement blended with sewage sludge ash	Evaluate the compatibility of sewage sludge ash (SSA) with various types of commercially available cements.	2008	Pinedo, Valencia, Spain	Wastewater treatment	1	Incineration	1
189	N. Husillos Rodríguez, R.J. Granados, M.T. Blanco-Varela, J.L. Cortina, S. Martínez-Ramírez, M. Marsal, M. Guillem, J. Puig, C. Fos, E. Larrotcha, J. Flores	Evaluation of a lime-mediated sewage sludge stabilisation process. Product characterisation and technological validation for its use in the cement industry	To describe an industrial process for stabilising sewage sludge with lime and evaluate the viability of the stabilised product as a raw material for the cement industry.	2012	Coll Cardus landfill, Barcelona, NE Spain	Wastewater treatment	1	Lime stabilisation	4
190	Environmental and technical assessments of the potential utilization of sewage sludge ashes (SSAs) as secondary raw materials in construction	Chen Maozhe, Blanc Denise, Gautier Mathieu, Mehu Jacques, Gourdon Rémy	Environmental and technical assessments of the potential utilization of sewage sludge ashes (SSAs) as secondary raw materials in construction	2013	To investigate the feasibility of using sewage sludge ashes (SSAs) to substitute cement and/or sand in the production of construction materials and determine the appropriate substitution ratios to satisfy both technical and environmental criteria.	Wastewater treatment	1	Incineration	1
191	Ahmad Assi, Fabjola Bilo, Stefania Federici, Annalisa Zacco, Laura E. Depero, Elza Bontempi	Bottom ash derived from municipal solid waste and sewage sludge co-incineration: First results about characterization and reuse	To characterize bottom ash derived from co-combustion of municipal solid waste with sewage sludge and suggest suitable reuse strategies.	2020	Brescia, Italy	Wastewater treatment	1	Co-incineration	1
192	Jun He, Feng Li, Yong Li, Xi-lin Cui	Modified sewage sludge as temporary landfill cover material	To study the feasibility of modified sewage sludge as landfill cover material and its performance in a complex landfill environment.	2015	Hubei Province, China	Urban sewage	2	Lime, cement, silt, TDA	4
193	Michael Anderson	Encouraging prospects for recycling incinerated sewage sludge ash (ISSA) into clay-based building products	To explore the potential for recycling incinerated sewage sludge ash (ISSA) into clay-based building products.	2001	Staffordshire University, College Road, Stoke-on-Trent ST4 2DE, UK	Wastewater treatment	1	Incineration	1
194	S.C. Chin, Doh Shu Ing, Andri Kusbiantoro, Saffuan Wan Ahmad	Characterization of sewage sludge ASH (SSA) in cement mortar	To study the potential use of SSA in cement based materials	2016	Kuantan, Malaysia	Wastewater treatment	1	Incineration at 600°C and 800°C	1
195	Aeslina Abdul Kadir, AmirulAmran, NurulSalhana Abdul Salim, MohdIkhmalHaqeem Hassan, Nurul Nabila Huda Hashar	Sewage Sludge Incorporating Into Fired Clay Brick: Indoor Air Quality Testing	To utilize sludge from the wastewater treatment plant into fired clay brick and investigate the indoor air quality of these bricks	2019	Johor, Malaysia (Senggarang and Perwira)	Wastewater treatment plants	1	The sewage sludge was dried in an oven at 105°C, ground, and crushed	1
196	Mohamad Nazli Md Jamil and Norazura Muhamad Bunnori	Reuse of Sewage Sludge Ashes in Cement Mortar Mixtures on Varies Incinerated Temperatures	To investigate the use of sewage sludge ash (SSA) as a natural admixture to the cement mortar in varying incinerated temperatures.	2016	Penang, Malaysia	Wastewater treatment	1	Incineration	1
197	Marta Kosior-Kazberuk	Application of SSA as Partial Replacement of Aggregate in Concrete	Assess the feasibility of utilizing ash derived from sewage sludge incineration as a component in concrete	2011	Białystok University of Technology, Poland	Municipal wastewater treatment	1	Incineration	1
198	Gabriela Rutkowska, Piotr Wichowski, Konrad Świgoń, Piotr Sobieski	Properties of concrete with fly ash addition from sewage sludge thermal treatment	Examination of the influence of fly ash from sewage sludge incineration on cement-based concrete	2017	Warsaw, Poland	Municipal wastewater treatment plant "Czajka"	1	Incineration in fluidized bed kilns	1
199	Jaehyuk Hyun, Min-Gil Kim	Field testing of conversion of sewage sludge to daily landfill cover material	To develop a cost-effective solidifying agent for conversion of sewage sludge to reduce odor generation and demonstrate its field applicability as landfill cover material.	2012	Daejeon, Korea	Wastewater treatment plant sludge	1	Solidification with quicklime and proprietary agents (TS103, TS101)	4
200	Zhiwen Wang, Bixiong Li, Xinxiao Liang	Utilization of river sediment, sewage sludge and wheat straw as the primary raw material in sintered-shale bricks	The main objective of this study was to address the problem of disposal and management of local biosolids (river sediments and sewage sludge) and local agricultural wastes (wheat straw) in Sichuan Province, China, by considering them as a rich construction material resource.	2022	Sichuan Province, China	wastewater treatment	1	Dried at 65°C for 24 hours and milled to be less than 2 mm	2
201	Souad Mekbel, Messaouda Debieche, Ammar Nechnech	The potential of sludge from wastewater treatment plants to improve the mechanical properties of bricks	To study the effect of adding sludge from wastewater treatment plants (WWTPs) in Eastern Algiers on swelling clay brick as a natural substitute for a degreaser to valorize it and minimize the risks related to its storage.	2023	Eastern Algiers, Algeria	Wastewater treatment plants (WWTPs)	1	Dried at 105°C, ground, and sieved	2
202	Minrui Huang, Huajun Feng, Na Li, Dongsheng Shen, Yuyang Zhou, Yufeng Jia	Addition of large amount of municipal sewage sludge as raw material in cement clinker production	To explore the maximum addition of municipal sewage sludge as a raw material in cement clinker production and compare different addition modes on cement product quality	2017	Hangzhou and Jinhua, Zhejiang, China	Municipal sewage treatment	2	Drying at 105°C to constant weight and ground to ASTM 200 mesh size	2
203	Kai Wu, Yuan Hu, Linglin Xu, Lintao Zhang, Xiong Zhang, Yufeng Su, Zhenghong Yang	Recycling of sewage sludge in clay-free thermal insulation brick: assessment of microstructure, performance, and environment impact	Investigate the recycling of municipal sewage sludge in the production of fired bricks and assess the microstructure, performance, and environmental impact	2022	Shanghai, China	Municipal sewage sludge	2	Drying and milling of sludge, followed by mixing with shale	2
204	Sen Chen, Yin Liu, Jiyan Ma, Yujiao Du, Chang Sun	Study on properties of sewage sludge cemented paste backfill and leaching mechanism of heavy metals	To investigate the properties of sewage sludge cemented paste backfill (SS-CPB) and the leaching mechanism of heavy metals in SS-CPB.	2023	Zaozhuang City, Shandong Province, China	Wastewater treatment	1	Dried in a vacuum drying oven and crushed through a 40 mesh screen	2
205	Tipraj Babu, Shanmugapriya Thangaraj	A Novel Approach for the Synthesis of Eco-friendly Geopolymer Ternary Blended Mortar with GGBS, Sugarcane Bagasse Ash, and Sewage Sludge Ash under Ambient Curing Conditions	1) To characterize the GGBS, SCBA, and SSA precursors for the production of geopolymer mortar. 2) To develop ternary blended GGBS-based geopolymer mortar by replacing GGBS with SCBA and SSA in 10%, 20%, and 30% by wt and to evaluate the effect of SCBA and SSA addition on the strength development. 3) To study the morphological character such as XRD, FE-SEM, and FTIR for the developed geopolymer mo…	2023	Vellore Institute of Technology (VIT), Vellore Campus, Tamil Nadu, India	Wastewater treatment	1	Incineration at 500°C to remove organic and combustible matter	1
206	Hadi Bahadori, Payam Hosseini	Developing green cement paste using binary and ternary cementitious blends of low pozzolanic sewage sludge ash and colloidal nanosilica (short-term properties)	To evaluate properties of green cement paste with appropriate strength and satisfactory durability	2018	Urmia, Iran	Wastewater treatment plant	1	Calcination at 800°C and grinding into fine particles	1
207	Shubham Goswami, Dharmendra Kumar Shukla, Pramod Kumar Singh	Sustainable transformation of sewage sludge ash and waste industrial additive into green cement blend	To explore the feasibility of using sewage sludge ash (SSA) and carbide lime sludge (CLS) for the production of green cement.	2022	Guna, Madhya Pradesh, India	Wastewater treatment	1	Incineration (at 730°C for 1 hour)	1
208	Mohammad Javad Amirjani, Ali Maleki, Amir Mohammad Ramezanianpour	Studying the effectiveness of sewage sludge ash and its combination with natural pozzolans in controlling alkali–silica reaction	To study the ability of SSA with two finenesses, three replacement levels, and also its ternaries with trass or pumice, as natural pozzolans, to control ASR	2024	Tehran, Iran	Wastewater treatment	1	Incineration at 800°C	1
209	Doh Shu Ing, Siew Choo Chin, Tan Kim Guan, Adilen Suil	The Use of Sewage Sludge Ash (SSA) as Partial Replacement of Cement in Concrete	To investigate the use of sewage sludge ash as partial replacement of cement in concrete and its effects on compressive strength, water absorption, and durability.	2016	Malaysia	Wastewater treatment	1	Incineration at 600°C for 3 hours	1
210	Prince Momar Gueye, Siham Kamali-Bernard, Dame Keinde, Fabrice Bernard, Vincent Sambou	Characterization of the Omni-Processor Sewage Sludge Ash for Reuse as Construction Material	Investigate fly ash and bottom ash from the Omni-Processor for potential reuse in the construction field.	2022	Dakar, Senegal and Rennes, France	Wastewater treatment	1	The ashes are derived from the incineration of sludge in the Omni-Processor.	1
211	Judith E. Halliday, M. Rod Jones, Thomas D. Dyer, Ravindra K. Dhir	Potential use of UK sewage sludge ash in cement-based concrete	To establish whether SSA can be effectively used as a replacement for cement or fine aggregate in cement-based concretes	2012	UK	Wastewater treatment	1	Incineration	1
212	M. C. Al-Mashhadani, T. M. Yousif	"Use of sludge in construction materials"	To evaluate the feasibility of using sludge in the production of construction materials	1997	Not specified	Wastewater treatment	1	Thermal drying, chemical stabilization	1
213	F. C. Chang, J. D. Lin, C. C. Tsai, K. S. Wang	Study on cement mortar and concrete made with sewage sludge ash	To investigate the feasibility of reusing wastewater sludge ash in construction materials to replace partial materials	2010	Taiwan	Wastewater treatment from thermal power plant	1	Incineration at 800°C to produce sewage sludge ash	1
214	Mohamed Aadraoui, Jamila Rais, Mohamed Elbaghdadi, Abdellah Ouigmane, Mohamed Mechadi	Characterization of sludge waste products from wastewater treatment plant of Khenifra city in Morocco	To examine the characteristics of sewage sludge from the wastewater treatment plant of Khenifra city to explore its potential use in building materials.	2019	Khenifra, Morocco	Wastewater treatment plant	1	Biological treatment (air drying, pulverization, sieving)	3
215	Esam Al-Qadhi, Gaiye Li, and Yaxing Ni	Influence of a Two‐Stage Sintering Process on Characteristics of Porous Ceramics Produced with Sewage Sludge and Coal Ash as Low‐Cost Raw Materials	Investigate the influence of a two-stage sintering process on the characteristics of porous ceramics made from sewage sludge and coal ash.	2019	College of Mechanics and Materials, Hohai University, Nanjing, China	Wastewater treatment	1	Two-stage sintering process	1
216	aisal Amin, Safeer Abbas, Wasim Abbass, Abdelatif Salmi, Ali Ahmed, Danish Saeed, Muhammad Sufian, Mohamed Mahmoud Sayed	Potential Use of Wastewater Treatment Plant Sludge in Fabrication of Burnt Clay Bricks	Investigate the potential of WTS in the manufacturing of clay bricks at an industrial scale	2022	Rawalpindi, Pakistan	Wastewater treatment plant	1	Dewatering using sand filtering, air-drying for 15 days	2
217	Fazel Azarhomayun, Mohammad Haji, Mahdi Kioumarsi, Ali Kheyroddin	Combined Use of Sewage Sludge Ash and Silica Fume in Concrete	To evaluate the potential impacts of the partial replacement of cement with sewage sludge ash (SSA) in both mortar and concrete and determine an optimum content for combining SSA with silica fume to compensate for the possible compressive strength reduction in concrete.	2023	Tehran, Iran	Wastewater treatment	1	Incineration at 900°C for 30 minutes	1
218	Francisco Baeza-Brotons, Pedro Garcés, Jordi Payá, José Miguel Saval	Portland cement systems with addition of sewage sludge ash. Application in concretes for the manufacture of blocks	Analyze the viability of using sewage sludge ash (SSA) as a raw material in concrete composition, especially for precast blocks	2014	Alicante, Spain	Wastewater treatment sludge (218)	1	Incineration	1
219	Francisco Baeza-Brotons, Jordi Payá, Oscar Galao, Marcos G. Alberti, Pedro Garcés	Concrete for Precast Blocks: Binary and Ternary Combination of Sewage Sludge Ash with Diverse Mineral Residue	Proposes binary and ternary combinations of sewage sludge ash (SSA) with fly ash (FA), marble dust (MD) and rice husk ash (RHA) as partial replacements of Portland cement in concretes	2020	Valencia, Spain	Wastewater treatment plants	1	Incineration	1
220	Danuta Barnat-Hunek, Piotr Smarzewski, Grzegorz Łagód, Zbigniew Suchorab	Evaluation of the Contact Angle of Hydrophobised Lightweight-Aggregate Concrete with Sewage Sludge	Evaluate the feasibility of using hydrophobic preparations based on organosilicon compounds for protection treatment of lightweight aggregates modified with municipal sewage sludge.	2015	Lublin, Poland	Wastewater treatment	1	Dewatering, mesophilic fermentation, compacting, drying, grinding, mixing with clay, forming, drying, and burning.	2
221	J.G. Bastidas-Martínez, J. Camapum de Carvalho, L.C. Lucena, M.M. Farias, H.A. Rondón-Quintana	Preliminary Study of Hot Mix Asphalt Containing Water Treatment and Sewage Sludge	Evaluate the mechanical response, moisture damage resistance, and abrasion properties of hot mix asphalt with 1% WTS and SS filler	2020	Brazil	Water treatment and sewage treatment plants	2	Calcination	1
222	Gabriel Borowski	Suitability Tests of Fly Ashes Vitrification from Sewage Sludge Incineration	To evaluate the suitability of vitrification of fly ashes from sewage sludge incineration for use as a substitute aggregate in road construction.	2012	Lublin, Poland	Wastewater treatment	1	Vitrification	4
223	Andelina Bubalo, Drazen Vouk, Nina Stirmer, Karlo Nad	Use of Sewage Sludge Ash in the Production of Innovative Bricks—An Example of a Circular Economy	To study the properties of clay bricks with various percentages of sewage sludge ash (SSA) and compare them with control bricks made of 100% clay.	2021	Croatia (WWTP Zagreb and WWTP Karlovac)	Wastewater treatment plants	1	Incineration at a temperature of 900°C	1
224	Nara Cangussu, Leandro Silva, Stephanie Rocha, Lino Maia	Incorporation of the Sludge of Sewage Treatment Plant on Ceramic Bricks Manufacture	Evaluate the effect of incorporating sewage sludge in ceramic mass for the manufacture of massive bricks	2022	Montes Claros, MG, Brazil	Sewage Treatment Plant (STS)	2	Drying and sieving	2
225	Thevaneyan Krishta David, Renga Rao Krishnamoorthy	Flexural and Compression Superiority of Sewage Sledge Ash Concrete	To assess the density, flexural strength, and compressive strength of concrete after 10 percent SSA replacement of cement and adding 10% SSA replacement of fine aggregate at 3, 7, and 21 days	2022	Universiti Teknologi Mara, Shah Alam, MALAYSIA	Wastewater treatment	1	Incineration at 1000°C for 2 hours	1
226	Anmar Dulaimi, Shaker Qaidi, Shakir Al-Busaltan, Abdalrhman Milad, Monower Sadique, Mustafa Amoori Kadhim, Ruqayah Al-Khafaji, Mohanad Muayad Sabri	Application of paper sludge ash and incinerated sewage ash in emulsified asphalt cold mixtures	To develop rapid-curing emulsified asphalt cold mixes (EACM) comprising a cementitious filler made from industrial by-product materials, specifically paper sludge ash (PSA) and incinerated sewage ash (ISA)	2023	Not explicitly mentioned	industrial, wastewater treatment	2	incineration	1
227	Maria P. Durante Ingunza, Anaxsandra C. L. Duarte, Rubens M. Nascimento	Use of Sewage Sludge as Raw Material in the Manufacture of Soft-Mud Bricks	To assess the use of sewage sludge as a raw material in the ceramic industry, specifically in the manufacture of soft-mud bricks.	2011	Universidade Federal do Rio Grande do Norte, Brazil	Septic tank cleaning company	4	Drained in a dry bed and treated in a stabilization pond	2
228	Xihui Fan, Wei Zhu, Yongjin Qian, Siling Wu, Shi Shu, Naixi Lin	Increasing the Hydraulic Conductivity of Solidified Sewage Sludge for Use as Temporary Landfill Cover	To study the effect of solidification and remolding on the hydraulic conductivity of sludge and to see whether the hydraulic conductivity could be increased to become suitable for temporary landfill cover	2019	Nanjing, China	Wastewater treatment plant	1	Solidification using ordinary Portland cement (OPC) or sulphoaluminate cement (SAC)	4
229	Maria C. A. Feitosa, Sílvio R. M. Ferreira, João M. P. Q. Delgado, Fernando A. N. Silva, Joaquim T. R. Oliveira, Pedro E. S. Oliveira, António C. Azevedo	Use of Sewage Sludge for the Substitution of Fine Aggregates for Concrete	This work analyzes the use of sewage sludge, generated in wastewater treatment plants, as an alternative for small aggregate to be used in concrete.	2023	Recife, Pernambuco, Brazil; Porto, Portugal	Wastewater treatment	1	Air-dried and sieved on a 4-mm mesh.	2
230	A. García‑Díaz, S. Bueno‑Rodríguez, M. A. Felipe‑Sesé, D. Eliche‑Quesada	Effect of the incorporation of spent diatomaceous earths on the properties of alkaline activation cements based on sewage sludge ash	Evaluate the synergistic effect of the incorporation of spent diatomaceous earth (SDE) from beer filtration on the technological properties of alkaline-activated cements (AACs) based on sewage sludge ash (SSA)	2024	Not specified	Wastewater treatment plant	1	Incineration	1
231	Thais Theomaris Grabowski, Juliana Martins Teixeira de Abreu Pietrobelli, Ramiro José Espinheira Martins	Eco-Friendly Cement Mortar with Wastewater Treatment Plant Sludge Upcycling	Investigate the technical feasibility of replacing cement in mortar production with sludge from wastewater treatment plants	2023	Bragança, Portugal	Wastewater treatment	1	Drying, sun-drying, and incineration	2
232	Erick Grünhäuser Soares, João Castro-Gomes, Mateusz Sitarz, Tomasz Zdeb, Izabela Hager	The Immobilisation of Heavy Metals from Sewage Sludge Ash in CO2-Cured Mortars	Evaluate the heavy metals leachability of CO2-cured mortars incorporating sewage sludge ash as filler	2021	University of Beira Interior (UBI), Portugal and Cracow University of Technology, Poland	Wastewater treatment plant in Płaszów, Krakow, Poland	1	Thermal treatment (combustion at around 800°C in a fluidised bed furnace)	1
233	Katarzyna Zabielska-Adamska​	"Sewage Sludge Bottom Ash Characteristics and Potential Application in Road Embankment"​	to present the geotechnical properties of sewage sludge bottom ash (SSA), thermally converted in an incineration plant in Łomża, Poland, and demonstrate that it can be considered as a substitute for mineral soils​	2020	Łomża, Poland​	municipal wastewater treatment​.	1	The sludge undergoes thermal treatment in a grate furnace incineration plant​	1
234	Alaa Hamood, Jamal M. Khatib, Craig Williams	The effectiveness of using Raw Sewage Sludge (RSS) as a water replacement in cement mortar mixes containing Unprocessed Fly Ash (u-FA)	To examine the performance of mortar mixes containing Unprocessed Fly Ash (u-FA) with either Raw Sewage Sludge (RSS) or water.	2017	UK	Wastewater treatment	1	Partial treatment with hydrated lime	4
235	Elżbieta Haustein, Aleksandra Kuryłowicz-Cudowska, Aneta Łuczkiewicz, Sylwia Fudala-Książek, Bartłomiej Michał Cieślik	Influence of Cement Replacement with Sewage Sludge Ash (SSA) on the Heat of Hydration of Cement Mortar	Evaluate the effect of sewage sludge ash (SSA) on the hydration heat process of cement mortars	2022	Gdańsk, Poland	Wastewater treatment	1	Thermal incineration	1
236	Shao-Hua Hu, Shen-Chih Hu & Yen-Pei Fu	Resource recycling through artificial lightweight aggregates from sewage sludge and derived ash using boric acid flux to lower co-melting temperature	To synthesize artificial lightweight aggregates from sewage sludge and derived ash using boric acid flux to lower co-melting temperature	2012	Hualien, Taiwan	Wastewater treatment	1	Preheating at 400°C for 0.5 hr and sintering at 850°C for 1 hr for sludge; sintering at 900°C for 1 hr for ash	1
237	Doh Shu Ing, Ramadhansyah Putra Jaya, Chia Min Ho, Siew Choo Chin, Marcin Nabiałek, Mohd Mustafa Al Bakri Abdullah, Sebastian Garus, Agata Śliwa	The impact of microwave treatment on the chemical properties of sewerage sludge	To explore an alternative method of developing good quality concrete material from sewerage sludge waste using microwave heating	2022	Malaysia and Poland	Wastewater treatment	1	Microwave heating	1
238	D. Istuque, L. Soriano, M.V. Borrachero, J. Payá, J.L. Akasaki, J.L.P. Melges, M.M. Tashima	Evaluation of the long-term compressive strength development of the sewage sludge ash/metakaolin–based geopolymer	To evaluate the long-term compressive strength development of the sewage sludge ash/metakaolin (SSA/MK)–based geopolymer	2021	Faculdade de Engenharia de Ilha Solteira, Universidade Estadual Paulista (UNESP), Ilha Solteira-SP, Brazil and ICITECH – Instituto de Ciencia y Tecnología del Hormigón, Universitat Politècnica de València (UPV), Valencia, Spain	Wastewater treatment	1	Uncontrolled autocombustion in a cylindrical oven	1
239	D.B. Istuque, L. Reig, J.C.B. Moraes, J.L. Akasaki, M.V. Borrachero, L. Soriano, J. Payá, J.A. Malmonge, M.M. Tashima	Behaviour of metakaolin-based geopolymers incorporating sewage sludge ash (SSA)	To study the influence of sewage sludge ash (SSA) on the mechanical strength and crystallization process of metakaolin-based geopolymers.	2016	São José do Rio Preto city, São Paulo, Brazil	Sewage sludge from wastewater treatment	2	Auto-combustion process	1
240	Danilo Bordan Istuque, Lucia Reig, Lourdes Soriano, Maria Victoria Borrachero, José Luiz Pinheiro Melges, Jorge Luis Akasaki, Jorge Juan Payá Bernabeu, Mauro Mitsuuchi Tashima	Evaluation of the pozzolanic activity of uncontrolled-combusted sewage sludge ash	The main objective is to evaluate the pozzolanic activity of sewage sludge ash (USSA) obtained following an uncontrolled-combustion process and to assess its impact on the compressive strength of Portland cement/USSA mortars.	Not explicitly mentioned, but references and acknowledgments suggest the study was conducted around 2019-2020.	The study was conducted using sewage sludge from the São José do Rio Preto wastewater treatment plant in São Paulo, Brazil.	Wastewater treatment	1	The treatment method involved drying the sewage sludge by solar radiation followed by uncontrolled combustion in a cylindrical chamber, and subsequent milling of the ash to increase its reactivity.	1
241	D.B. Istuque, L. Reig, J.C.B. Moraes, J.L. Akasaki, M.V. Borrachero, L. Soriano, J. Payá, J.A. Malmonge, M.M. Tashima	Behaviour of metakaolin-based geopolymers incorporating sewage sludge ash (SSA)	Assess the long-term influence of SSA in MK-based geopolymer, as well as the influence of the SiO2/Na2O molar ratio and curing conditions for SSA/MK-based geopolymers	2019	São José do Rio Preto city, São Paulo, Brazil	Sewage treatment plant	2	Auto-combustion process	1
242	M. Jamshidi, A. Jamshidi, N. Mehrdadi, F. Pacheco-Torgal	Mechanical performance and capillary water absorption of sewage sludge ash concrete (SSAC)	Evaluate the mechanical performance and capillary water absorption of sewage sludge ash concrete	2012	Iran	Wastewater treatment	1	Incineration	1
243	Ruth Katlego Juala, Yunus Ballim, Jean Mulopo	Assessment of local sewage sludge ash as a supplementary cementitious material – effects of incineration temperature and cooling rate of the ash	Evaluating the feasibility of ISSA from a wastewater treatment plant in Gauteng to be used as an SCM in cement-based materials for construction	2022	Gauteng, South Africa	Wastewater treatment plant	1	Incineration at 700°C, 800°C, 900°C; cooling in furnace, air, or by quenching in water	1
244	Tomasz Kalak, Patrycja Szypura, Ryszard Cierpiszewski, Malgorzata Ulewicz	Modification of Concrete Composition Doped by Sewage Sludge Fly Ash and Its Effect on Compressive Strength	To determine the influence of sewage sludge fly ash (SSFA) waste generated during the combustion process of municipal sewage sludge in a fluidized bed furnace on the compressive strength of different classes of concrete.	2023	Poznan University of Economics and Business, Poznan, Poland; Czestochowa University of Technology, Czestochowa, Poland	Wastewater treatment	1	Thermal conversion in a fluidized bed furnace	1
245	N. Kanari, F. Diot, C. Gauthier, J. Yvon	Use of residual materials for synthesis of lightweight granulates by thermal treatment process	To explore the formulation and production of expanded lightweight granulates incorporating residual materials such as kaolinitic waste, sewage sludge, schist fines, and wasted glass.	2016	Université de Lorraine, GeoRessources Laboratory, France	Wastewater treatment	1	Thermal treatment and thermochemical expansion	1
246	Annemette Kappel, Lisbeth M. Ottosen, Gunvor M. Kirkelund	Colour, compressive strength and workability of mortars with an iron-rich sewage sludge ash	To examine how the milling of sewage sludge ash affects the colour, compressive strength, and workability of mortar	2017	Copenhagen, Denmark	Wastewater treatment plant	1	Drying and milling	2
247	Annemette Kappel, Raimon Parés Viader, Krzysztof Piotr Kowalski, Gunvor M. Kirkelund, Lisbeth M. Ottosen	Utilisation of Electrodialytically Treated Sewage Sludge Ash in Mortar	To investigate the potential of using electrodialytically treated sewage sludge ash (SSA) as a cement replacement in mortar to recover phosphorus and assess the mortar's properties	2018	Copenhagen, Denmark	Wastewater treatment plant	1	Electrodialytic treatment of SSA	1
248	Dongwon Ki, Shin Young Kang, Kwang-Min Park	Upcycling of Wastewater Sludge Incineration Ash as a 3D Printing Technology Resource	To explore the use of wastewater sludge incineration ash (WSIA) in the 3D printing industry as a sustainable material.	2021	Seoul, South Korea	Wastewater treatment facilities	1	Incineration	1
249	Koichi Kobayashi, Wataru Koyanagi	17-Year-Long Sewage Sludge Ash Concrete Exposure Test	To establish an efficient use of sewage sludge ash (SSA) as a cement replacement material in concrete and assess the long-term properties of SSA concrete.	2021	Gifu city and Takayama city, Japan	Sewage treatment plants	2	Incineration to ash	1
250	Barbora Krejcirikova, Lisbeth M. Ottosen, Gunvor M. Kirkelund, Carsten Rode, Ruut Peuhkuri	Characterization of sewage sludge ash and its effect on moisture physics of mortar	To investigate the potential use of ash obtained as an incinerated by-product in sewage sludge treatment as a possible supplementary cementitious material.	2019	Denmark	Municipal wastewater treatment	1	Water washing and grinding of the sewage sludge ash.	1
251	Barbora Krejcirikova, Carsten Rode, Ruut Peuhkuri	Determination of hygrothermal properties of cementitious mortar: The effect of partial replacement of cement by SSA	To assess the effect of cement replacement by SSA on heat and moisture transport properties of mortar	2019	Technical University of Denmark	Wastewater treatment plants	1	Water washing and grinding	1
252	Mithesh Kumar, Shreelaxmi Prashant, Muralidhar V. Kamath	Enhancing the sustainability of high strength concrete in terms of embodied energy and carbon emission by incorporating sewage sludge and fly ash	To investigate the use of sewage sludge and fly ash as partial replacements in concrete to enhance sustainability	2022	Manipal, Karnataka, India	Wastewater treatment plant	1	Dried and ground to 150 µm and 75 µm	2
253	Saadia Lagrani, Ayoub Aziz, Abdelilah Bellil, Khadija Felaous, Mohammed Achab, Mohammed Fekhaoui	Synthesis and Characterization of Slag-Sludge-Based Eco-Friendly Materials – Industrial Implications	To investigate the stabilization and solidification of a geopolymer based on sewage sludge and blast furnace slag, and its potential use as a thermal insulation material	2023	Ain Aouda, Morocco	Wastewater treatment plant	1	Dehydrated and stabilized with slaked lime	2
254	Jolanta Latosińska, Maria Żygadło, Przemysław Czapik	The Influence of Sewage Sludge Content and Sintering Temperature on Selected Properties of Lightweight Expanded Clay Aggregate	To evaluate the influence of sewage sludge content and sintering temperature on LECA physical properties.	2021	Kielce, Poland	Wastewater treatment plant	1	Stabilized and dewatered	1
255	P.C. Lau, D.C.L. Teo, M.A. Mannan	Mechanical, durability and microstructure properties of lightweight concrete using aggregate made from lime-treated sewage sludge and palm oil fuel ash	Investigate the properties of lightweight aggregate concrete using lime-treated sewage sludge and palm oil fuel ash	2018	Universiti Malaysia Sarawak, Malaysia	Sewage sludge from wastewater treatment	2	Lime-treated sewage sludge and palm oil fuel ash	4
256	Changyong Li, Xiaoyan Zhang, Bingxin Zhang, Yunfei Tan, Fenglan Li	Reuse of Sintered Sludge from Municipal Sewage Treatment Plants for the Production of Lightweight Aggregate Building Mortar	To evaluate the feasibility of producing lightweight aggregate building mortar using sintered sludge from municipal sewage treatment plants.	2021	Zhengzhou, China	Municipal sewage treatment plant	2	Sintering	1
257	Y. L. Li, J. W. Liu, J. Y. Chen, Y. F. Shi, W. Mao, H. Liu, Y. Li, S. He, J. K. Yang	Reuse of Dewatered Sewage Sludge Conditioned with Skeleton Builders as Landfill Cover Material	To investigate the reuse of dewatered sewage sludge conditioned with skeleton builders as landfill cover material.	2014	Wuhan, China	Municipal wastewater treatment	1	Dewatering with skeleton builders (fly ash, lime)	2
258	Deng-Fong Lin, Kuo-Liang Lin, Huan-Lin Luo, Jia-Qin Xu	Acid-Alkali Resistance of New Reclaimed Tiles Containing Sewage Sludge Ash and Waste Glass	To investigate the properties and acid-alkali resistance of reclaimed tiles made with sewage sludge ash and waste glass.	2016	Kaohsiung City, Taiwan	Wastewater treatment sludge	1	Sewage sludge ash (SSA) was incinerated in a kiln at 800°C for 20 hours and ground into a powder.	1
259	Junzhe Liu, Jianbin Chen, Zhimin He, Guoliang Zhang	Study on Performance of Concrete Made from Sewage Sludge Ceramsite	To analyze the performance of concrete made from sewage sludge ceramsite and optimize its production process.	2011	Ningbo, China	Wastewater treatment plant	1	Sludge was dried, pulverized, mixed with fly ash, kneaded into pellets, and then sintered.	1
260	Wei Liu, Haihua Cao, et al.	Role of Municipal Sewage Sludge in Incorporating Cr, Ni, Cu, and Zn into Cement Clinker	To examine how municipal sewage sludge influences the fixation of heavy metals during clinkerization	2018	Beijing, China	Municipal wastewater	1	Not explicitly mentioned	6
261	Jian-Xin Lu, Yifan Zhou, Pingping He, Shengnan Wang, Peiliang Shen, Chi Sun Poon	Sustainable reuse of waste glass and incinerated sewage sludge ash in insulating building products: Functional and durability assessment	To develop green concrete partition wall blocks using recycled glass as aggregates and incinerated sewage sludge ash (ISSA) as a partial replacement of Portland cement and assess their functional and durability performances.	2019	Hong Kong	Wastewater treatment	1	Incineration	1
262	Paweł Łukowski, Elżbieta Horszczaruk, Cyprian Seul, Jarosław Strzałkowski	Mechanical Strength and Thermal Properties of Cement Concrete Containing Waste Materials as Substitutes for Fine Aggregate	To investigate the effect of recycled aggregates (including burnt sewage sludges) on the properties of cement concrete.	2022	Warsaw University of Technology & West Pomeranian University of Technology in Szczecin, Poland	Municipal wastewater treatment plant	1	Burning in a moving grate boiler after drying	1
263	Saber Medaoud, Larbi Mokrani, Samy Mezhoud, Sami Ziane	Characterization of Stabilized Sewage Sludge for Reuse in Road Pavement	To evaluate the effect of combined binders (Cement/Lime and Cement/Limestone Filler) on the mechanical and geotechnical properties of sewage sludge for use in road construction	2022	Constantine district, Algeria	Wastewater treatment	1	Solidification-Stabilization (S-S) using Cement/Lime and Cement/Limestone Filler	4
264	Mehdi Mejdi, Mickael Saillio, Thierry Chaussadent, Loic Divet, Arezki Tagnit-Hamou	Hydration mechanisms of sewage sludge ashes used as cement replacement	Identify and quantify the changes in hydration products upon SSA addition to Portland cement	2020	Université Gustave Eiffel, France; Université de Sherbrooke, Canada	Urban wastewater treatment in Grenoble region, France	1	Incineration to produce sewage sludge ash at 850°C	1
265	Abbas Mohajerani, Aruna Ukwatta, Tristan Jeffrey-Bailey, Michael Swaney, Mohtashim Ahmed, Glen Rodwell, Simon Bartolo, Nicky Eshtiaghi, Sujeeva Setunge	A Proposal for Recycling the World’s Unused Stockpiles of Treated Wastewater Sludge (Biosolids) in Fired-Clay Bricks	To propose the utilization of leftover biosolids in fired-clay bricks to reduce stockpiles and the environmental impact of brick manufacturing	2019	Melbourne, Australia	Wastewater treatment	1	Dewatering and Treatment	2
266	Rawa Shakir Muwashee	The Sustainability of Cement Mortar with Raw Sewage Sludge and Rice Husk Ash	To investigate the use of Raw Sewage Sludge (RSS) and Rice Husk Ash (RHA) to obtain sustainable construction materials, particularly focusing on the evaluation of cement-based materials with these components.	2020	Kufa, Iraq	Wastewater treatment	1	Partial treatment by adding hydrated lime to raise pH > 12	4
267	Petronela Nechita, Ştefania Miţa Ionescu	Valorization of Municipal Wastewater Treatment Plant Sludge and Agro-Waste in Building Materials with Thermal Insulation Properties	To assess the effect of using sewage sludge and agro-waste as a partial replacement for clay on the thermal insulation properties of conventional building materials.	2017	Brăila, Romania	Wastewater treatment plant sludge	1	Air-dried and calcinated at 950°C for 1 hour	2
268	Paweł Ogrodnik, Gabriela Rutkowska, Jacek Szulej, Mariusz Żółtowski, Aleksandra Powęzka, Artur Badyda	Cement Mortars with Addition of Fly Ash from Thermal Transformation of Sewage Sludge and Zeolite	Evaluate the influence of fly ash and zeolite on selected parameters of cement mortar	2022	Warsaw, Poland	Wastewater treatment	1	Thermal transformation	1
269	Lisbeth M. Ottosen, Ida M.G. Bertelsen, Pernille E. Jensen, Gunvor M. Kirkelund	Sewage sludge ash as resource for phosphorous and material for clay brick manufacturing	To investigate the properties of brick materials with different replacement percentages of clay with SSA-EDS and to evaluate their color potential	2020	Avedøre Spildevandscenter BIOFOS, Copenhagen, Denmark	Wastewater treatment plant sludge	1	Electrodialytic separation (EDS) method	1
270	M. Pérez-Carrión, F. Baeza-Brotons, J. Payá, J.M. Saval, E. Zornoza, M.V. Borrachero, P. Garcés	Potential use of sewage sludge ash (SSA) as a cement replacement in precast concrete blocks	To explore the technological feasibility of re-using sewage sludge ash (SSA) as a Portland cement replacement in commercially manufactured precast concrete blocks.	2014	Alicante and Valencia, Spain	Wastewater treatment	1	Incineration using a fluidized bed incinerator	1
271	Li Ping, Gang Zhao, Xiaohu Lin, Yunhui Gu, Wei Liu, Haihua Cao, Juwen Huang, Guangming Li, Jingcheng Xu	Feasibility and Carbon Footprint Analysis of Lime-Dried Sludge for Cement Production	Investigate the feasibility of using lime-dried sludge for cement production and analyze energy balance and carbon footprint	2020	Beijing, China	Wastewater treatment plant sludge	1	Lime-drying	4
272	Teresa Rucińska, Anna Głowacka, Robert Sidełko	The Influence of Incinerated Sewage Sludge as an Aggregate on the Selected Properties of Cement Mortars	To determine the feasibility of using incinerated municipal sewage sludge as a fine aggregate in cement mortars.	2021	Poland	Municipal wastewater treatment	1	Incineration	1
273	Gabriela Rutkowska	Assessment of Fly Ash from Thermal Treatment of Sewage Sludge According to the Applicable Standards	To analyze and evaluate the physicochemical composition of fly ash from thermal treatment of sewage sludge	2023	Warsaw, Cracow, and Łódź, Poland	Wastewater Treatment	1	Thermal treatment (combustion in fluidized bed furnace)	1
274	Zhang, X.; Jiao, Y.; Yu, L.; Liu, L.; Wang, X.; Zhang, Y.	Effect of Sewage Sludge Addition on Microstructure and Mechanical Properties of Kaolin-Sewage Sludge Ceramic Bricks	To investigate the effect of sewage sludge on the microstructure, phase composition, and mechanical properties of kaolin-sewage sludge ceramic bricks.	2022	Peking University, Beijing, China and Anhui University of Technology, Maanshan, China	Wastewater treatment	1	The sludge was dried and then milled before being mixed with kaolin and sintered at high temperatures	2.1
275	Tao Zhang, Xiaoshuang Shi, Qingyuan Wang, Wenbin Peng	Comprehensive Evaluation of the Performance and Benefits of SSA–GGBS Geopolymer Mortar	To evaluate the performance and benefits of geopolymer mortar using SSA and GGBS as raw materials, focusing on fresh properties, mechanical performance, economic benefits, and environmental impacts.	2023	Chengdu, China	Wastewater treatment plant	1	Incineration at 850°C	1
276	Gabriela Rutkowska, Paweł Ogrodnik, Joanna Fronczyk, Ayla Bilgin	Temperature Influence on Ordinary Concrete Modified with Fly Ashes from Thermally Conversed Municipal Sewage Sludge Strength Parameters	Assessment of rational application possibilities of fly ashes from thermally conversed municipal sewage sludge as an alternative concrete admixture	2020	Warsaw University of Life Sciences, Main School of Fire Service in Warsaw, and Artvin Coruh University, Turkey	Municipal sewage treatment	2	Thermal conversion	1
277	Gabriela Rutkowska, Paweł Ogrodnik, Mariusz Żółtowski, Aleksandra Powęzka, Michał Kucharski, Martin Krejsa	Fly Ash from the Thermal Transformation of Sewage Sludge as an Additive to Concrete Resistant to Environmental Influences in Communication Tunnels	To assess the possibility of using fly ash from the thermal treatment of sewage sludge as an alternative additive to concretes resistant to environmental influences	2022	Warsaw, Poland and Ostrava, Czech Republic	Municipal sewage sludge treatment plants	2	Thermal transformation (incineration)	1
278	Gabriela Rutkowska, Piotr Wichowski, Małgorzata Franus, Michał Mendryk, Joanna Fronczyk	Modification of Ordinary Concrete Using Fly Ash from Combustion of Municipal Sewage Sludge	To assess the properties of ordinary concretes with modified composition using FAMSS.	2020	Warsaw, Poland	Wastewater treatment plant	1	Combustion of municipal sewage sludge	1
279	Gabriela Rutkowska, Mariusz Żółtowski, Michał Liss	The Use of Modal Analysis in Addition Percentage Differentiation, and Mechanical Properties of Ordinary Concretes with the Addition of Fly Ash from Sewage Sludge	To investigate the influence of fly ash from sewage sludge on concrete parameters and to explore the use of modal analysis for distinguishing concrete mix compositions.	2021	Warsaw, Poland	Municipal wastewater treatment	1	Thermal treatment to produce fly ash	1
280	Gabriela Rutkowska, Mariusz Żółtowski, Konstantin Rusakov, Katarzyna Pawluk, Joanna Andrzejak, Bogdan Żółtowski	"The Influence of Fly Ash from Sewage Sludge on the Concrete Carbonation Course"	To assess the course of carbonation of concrete produced from fly ash of sewage sludge over time and describe this phenomenon mathematically. Also, to analyze the physicochemical composition of sludge ash.	2023	Krakow, Poland	Wastewater treatment	1	Thermal treatment	1
281	Nurul Salhana ABDUL SALIM, Aeslina ABDUL KADIR, Norazian MOHAMED NOOR	Conservation of Natural Resources: Utilization of Sewage Sludge in Brick and its Impact on Gas Emissions and Indoor Air Quality	To investigate pollutant gases during the firing process and the indoor air quality of manufactured fired clay brick incorporated with sewage sludge.	2023	Batu Pahat, Johor, Malaysia	Wastewater treatment	1	Dried in an oven, grinded, and sieved	2
282	Zbigniew Suchorab, Danuta Barnat-Hunek, Małgorzata Franus, Grzegorz Łagód	Mechanical and Physical Properties of Hydrophobized Lightweight Aggregate Concrete with Sewage Sludge	To examine lightweight aggregate-concrete modified by municipal sewage sludge	2016	Lublin, Poland	Municipal wastewater treatment	1	Sewage sludge dried at 105°C and ground	2
283	Zbigniew Suchorab, Danuta Barnat-Hunek, Małgorzata Franus, Grzegorz Łagód, Zbyšek Pavlík	The Possibility of Utilization of Sewage Sludge as a Filler in Production of the Lightweight Aggregate Concrete	To investigate the thermal and hygric properties of lightweight aggregate-concrete supplemented with municipal sewage sludge.	2019	Lublin University of Technology, Poland; Czech Technical University in Prague, Czech Republic	Municipal wastewater treatment	1	Drying and grinding, then supplemented with clay and fired at 1150 °C	2
284	Keke Sun, Hafiz Asad Ali, Yamei Cai, Dongxing Xuan, Chi Sun Poon	Recycling of incinerated sewage sludge ash and waste glass powder in alkali-activated slag for sewer rehabilitation	Utilize two local solid wastes (ISSA and GP) for the development of novel microbial-resistant alkali-activated materials (AAMs) for sewerage infrastructure rehabilitation	2024	Hong Kong	Wastewater treatment	1	Incineration	1
285	Łukasz Szarek, Małgorzata Wojtkowska	Properties of fly ash from thermal treatment of municipal sewage sludge in terms of EN 450-1	To analyze the chemical composition and physical properties of fly ash from thermal treatment of municipal sewage sludge in terms of its use in concrete technologies.	2018	Warsaw University of Technology, Poland	Municipal sewage treatment	2	Thermal treatment of municipal sewage sludge	1
286	Prince Momar Gueye, Siham Kamali-Bernard, Dame Keinde, Fabrice Bernard, Vincent Sambou	Characterization of the Omni-Processor Sewage Sludge Ash for Reuse as Construction Material	The study investigates the reuse potential of fly ash and bottom ash from the Omni-Processor in construction materials.	2022	LE3PI of E S P-UCAD, Dakar, Senegal, and LGCGM of INSA of Rennes, Rennes, France	Wastewater treatment	1	Incineration using Omni-Processor to generate ash	1
287	Chao-Wei Tang, Chiu-Kuei Cheng	Sustainable Use of Sludge from Industrial Park Wastewater Treatment Plants in Manufacturing Lightweight Aggregates	Investigate the development of a process for manufacturing lightweight aggregates (LWAs) by incorporating sludge from wastewater treatment plants in industrial parks with reservoir sediments	2022	Sinying Industrial Park, Taiwan	Wastewater treatment plants	1	High-temperature sintering at 1200-1250 °C	1
288	M. A. Tantawy, A. M. El-Roudi, Elham M. Abdalla, M. A. Abdelzaher	Fire Resistance of Sewage Sludge Ash Blended Cement Pastes	Investigate the hydration characteristics and the fire resistance of sewage sludge ash blended cement pastes	2013	Minia University, Minia, Egypt	Wastewater treatment	1	Incineration at 800°C	1
289	M. M. Tashima, L. Reig, M. A. Santini Jr., J. C. B Moraes, J. L. Akasaki, J. Payá, M. V. Borrachero, L. Soriano	Compressive Strength and Microstructure of Alkali-Activated Blast Furnace Slag/Sewage Sludge Ash (GGBS/SSA) Blends Cured at Room Temperature	To assess the production of alkali-activated pastes and mortars using ground granulated blast furnace slag (GGBS) and sewage sludge ash (SSA) blends.	2016	Not explicitly stated, but sewage sludge was obtained from SeMAE (São José do Rio Preto, Brazil).	Sewage sludge from wastewater treatment (SeMAE).	2	The sludge was incinerated to produce sewage sludge ash (SSA), which was then ground using a ball mill.	1
290	Antonio José Tenza-Abril, José Miguel Saval, Artemio Cuenca	Using Sewage-Sludge Ash as Filler in Bituminous Mixes	Investigating the behavior of bituminous mixes made with sewage sludge ash (SSA) as mineral filler.	2014	Zaragoza, Spain	Wastewater treatment	1	Incineration	1
291	Sathya Thukkaram and Ammasi ArunKumar	"Behaviour of sewage sludge based lightweight aggregate in geopolymer concrete"	Investigate the preparation of lightweight aggregates through sintering and cold bonding methods, incorporating a blend of lime, fly ash, and sewage sludge.	2024	Vellore Institute of Technology, Chennai, India	Wastewater treatment plant	1	Sintering and cold bonding	1
292	Isao Tsuyumoto and Hiroshi Uchikawa	Microstructures of Hardened Mortars Using Eco-Cements and Sintered Sewage Sludge	To investigate the strength development and microstructures of hardened mortar using eco-cements with incineration ash and sintered sewage sludge aggregates.	2002	Kanazawa Institute of Technology, Ishikawa, Japan	Urban wastewater treatment	1	Sintering	1
293	Raguraman Vaithiyasubramanian, Deepasree Srinivasan, Arul Kumar Kanagarajan	Study on preparation of brick blocks by using construction waste and sludge	Effective utilization of treated sludge waste and waste additives in manufacturing brick samples, eliminating the use of clay.	2022	Coimbatore, India	Sewage treatment plant	2	Drying in an oven at 105 °C for 2 days to remove organic substances	2
294	Dražen Vouk, Marijana Serdar, Aleksandra Anić Vučinić	Use of incinerated sewage sludge ash in cement mortars: case study in Croatia	Investigating the possibility and justification of using incinerated sewage sludge ash (ISSA) in cement mortar production with partial cement replacement.	2017	Croatia	Wastewater treatment	1	Incineration at 800 °C	1
295	Krzysztof Wiśniewski, Gabriela Rutkowska, Katarzyna Jeleniewicz, Norbert Dąbkowski, Jarosław Wójt, Marek Chalecki, Jarosław Siwiński	The Impact of Fly Ashes from Thermal Conversion of Sewage Sludge on Properties of Natural Building Materials on the Example of Clay	Assessment of the influence of fly ashes on selected parameters of building materials	2022	Warsaw, Poland	Municipal sewage treatment plants	2	Thermal conversion (incineration)	1
296	Krzysztof Wiśniewski, Gabriela Rutkowska, Katarzyna Jeleniewicz, Norbert Dąbkowski, Jarosław Wójt, Marek Chalecki, Tomasz Wierzbicki	Ecologically Friendly Building Materials: A Case Study of Clay–Ash Composites for the Efficient Management of Fly Ash from the Thermal Conversion of Sewage Sludge	To develop new building materials combining clay and fly ash from sewage sludge, focusing on strength, durability, and ecological benefits.	2024	Warsaw University of Life Sciences, Poland	Wastewater treatment	1	Thermal conversion (incineration)	1
297	Gabriel Rutkowska,Marek Chalecki,Mariusz Zoltowski	Fly Ash from Thermal Conversion of Sludge as a Cement Substitute in Concrete Manufacturing	To evaluate the possibility of using fly ash from the thermal conversion of sludge as a cement substitute in concrete manufacturing	2021	poland	Municipal sewage treatment	2	Thermal conversion	1
298	Jian Wu, Shuai-shuai Yin, Li-dan Zhang, Xin Song	Manufacture of sustainable fired shale bricks using sewage sludge as raw material	To assess the use of shale and sewage sludge for manufacturing fired shale bricks, reducing environmental impact	2021	Xi'an, Shaanxi, China	Wastewater treatment	1	Compressed dehydration	2
299	Jingcheng Xu, Li Ping, Haihua Cao, Wei Liu, Yunhui Gu, Xiaohu Lin, Juwen Huang	Application Status of Co-Processing Municipal Sewage Sludge in Cement Kilns in China	To investigate and analyze the present situation, development, and main routes of co-processing municipal sewage sludge in cement kilns in China	2019	China	Municipal wastewater treatment	1	Co-processing in cement kilns	1
300	Wei Xu, Fei Li, Guang Ming Li	Partial Substitution of Lime-Dried Sludge as a Flux for Cement Sintering Ingredients	Investigate the use of lime-dried sludge (LDS) as a substitute for raw meal and sintering additive for cement clinker production.	2024	China	Municipal wastewater treatment plant	1	Lime drying	4
301	Jiankang Yang, Haijun Lu, Xiong Zhang, Jixiang Li, Weiwei Wang	An Experimental Study on Solidifying Municipal Sewage Sludge through Skeleton Building Using Cement and Coal Gangue	To evaluate the feasibility of using a skeleton-building method to solidify municipal sewage sludge using coal gangue, cement, clay, and fiber as materials.	2017	Wuhan Hanxi sewage treatment plant, Fuxin Open-Pit Coal Mine, Liaoning Province, China	Municipal sewage	2	Skeleton building using cement and coal gangue	6
							1
							1
							1
							1
							1
							1
							1
							1
							1
							1
							1
							1
							1
							1
							1
							1
							1
							1
							1
							1
							1
							1
							1
							1
							1
							1
							1
							1
							1
							1
							1
							1
							1
							1
							1
							1
							1
							1
							1
							1
							1
							1
							1
							1
							1
							1
							1
							1
							1
							1
							1
							1
							1
							1
							1
							1
							1
							1
							1
							1
							1
							1
							1
							1
							1
							1
							1
							1
							1
							1
							1
							1
							1
							1
							1
							1
							1
							1
							1
							1
							1
							1
							1
							1
							1
							1
							1
							1
							1
							1
							1
							1
							1
							1
							1
							1
							1
							1
							1
							1
							1
							1
							1
							1
							1
							1
							1
							1
							1
							1
							1
							1
							1
							1
							1
							1
							1
							1
							1
							1
							1
							1
							1
							1
							1
							1
							1
							1
							1
							1
							1
							1
							1
							1
							1
							1
							1
							1
							1
							1
							1
							1
							1
							1
							1
							1
							1
							1
							1
							1
							1
							1
							1
							1
							1
							1
							1
							1
							1
							1
							1
							1
							1
							1
							1
							1
							1
							1
							1
							1
							1
							1
							1
							1
							1
							1
							1
							1
							1
							1
							1
							1
							1
							1
							1
							1
							1
							1
							1
							1
							1
							1
							1
							1
							1
							1
							1
							1
							1
							1
							1
							1
							1
							1
							1
							1
							1
							1
							1
							1
							1
							1
							1
							1
							1
							1
							1
							1
							1
							1
							1
							1
							1
							1
							1
							1
							1
							1
							1
							1
							1
							1
							1
							1
							1
							1
							1
							1
							1
							1
							1
							1
							1
							1
							1
							1
							1
							1
							1
							1
							1
							1
							1
							1
							1
							1
							1
							1
							1
							1
							1
							1
							1
							1
							1
							1
							1
							1
							1
							1
							1
							1
							1
							1
							1
							1
							1
							1
							1
							1
							1
							1
							1
							1
							1
							1
							1
							1
							1
							1
							1
							1
							1
							1
							1
							1
							1
							1
							1
							1
							1
							1
							1
							1
							1
							1
							1
							1
							1
							1
							1
							1
							1
							1
							1
							1
							1
							1
							1
							1
							1
							1
							1
							1
							1
							1
							1
							1
							1
							1
							1
							1
							1
							1
							1
							1
							1
							1
							1
							1
							1
							1
							1
							1
							1
							1
							1
							1
							1
							1
							1
							1
							1
							1
							1
							1
							1
							1
							1
							1
							1
							1
							1
							1
							1
							1
							1
							1
							1
							1
							1
							1
							1
							1
							1
							1
							1
							1
							1
							1
							1
							1
							1
							1
							1
							1
							1
							1
							1
							1
							1
							1
							1
							1
							1
							1
							1
							1
							1
							1
							1
							1
							1
							1
							1
							1
							1
							1
							1
							1
							1
							1
							1
							1
							1
							1
							1
							1
							1
							1
							1
							1
							1
							1
							1
							1
							1
							1
							1
							1
							1
							1
							1
							1
							1
							1
							1
							1
							1
							1
							1
							1
							1
							1
							1
							1
							1
							1
							1
							1
							1
							1
							1
							1
							1
							1
							1
							1
							1
							1
							1
							1
							1
							1
							1
							1
							1
							1
							1
							1
							1
							1
							1
							1
							1
							1
							1
							1
							1
							1
							1
							1
							1
							1
							1
							1
							1
							1
							1
							1
							1
							1
							1
							1
							1
							1
							1
							1
							1
							1
							1
							1
							1
							1
							1
							1
							1
							1
							1
							1
							1
							1
							1
							1
							1
							1
							1
							1
							1
							1
							1
							1
							1
							1
							1
							1
							1
							1
							1
							1
							1
							1
							1
							1
							1
							1
							1
							1
							1
							1
							1
							1
							1
							1
							1
							1
							1
							1
							1
							1
							1
							1
							1
							1
							1
							1
							1
							1
							1
							1
							1
							1
							1
							1
							1
							1
							1
							1
							1
							1
							1
							1
							1
							1
							1
							1
							1
							1
							1
							1
							1
							1
							1
							1
							1
							1
							1
							1
							1
							1
							1
							1
							1
							1
							1
							1
							1
							1
							1
							1
							1
							1
							1
							1
							1
							1
							1
							1
							1
							1
							1
							1
							1
							1
							1
							1
							1
							1
							1
							1
							1
							1
							1
							1
							1
							1
							1
							1
							1
							1
							1
							1
							1
							1
							1
							1
							1
							1
							1
							1
							1
							1
							1
							1
							1
							1
							1
							1
							1
							1
							1
							1
							1
							1
							1
							1
							1
							1
							1
							1
							1
							1
							1
							1
							1
							1
							1
							1
							1
							1
							1
							1
							1
							1
							1
							1
							1
							1
							1
							1
							1
							1
							1
							1
							1
							1
							1
							1
							1
							1
							1
							1
							1
							1
							1
							1
							1
							1
							1
							1
							1
							1
							1
							1
							1
							1
							1
							1
							1
							1
							1
							1
							1
							1
							1
							1
							1
							1
							1
							1
							1
							1
							1
							1
							1
							1
							1
							1
							1
							1
							1
							1
							1
							1
							1
							1
							1
							1
							1
							1
							1
							1
							1
							1
							1
							1
							1
							1
							1
							1
							1
							1
							1
							1
							1
							1
							1
							1
							1
							1
							1
							1
							1
							1
							1
							1
							1
							1
							1
							1
							1
							1
							1
							1
							1
							1
							1
							1
							1
							1
							1
							1
							1
							1
							1
							1
							1
							1
							1
							1
							1
							1
							1
							1
							1
							1
							1
							1
							1
							1
							1
							1
							1
							1
							1
							1
							1
							1
							1
							1
							1
							1
							1
							1
							1
							1
							1
							1
							1
							1
							1
							1
							1
							1
							1
							1
							1
							1
							1
							1
							1
							1
							1
							1
							1
							1
							1
							1
							1
							1
							1
							1
							1
							1
							1
							1
							1
							1
							1
							1
							1
							1
							1
							1
							1
							1
							1
							1
							1
							1
							1
							1
							1
							1
							1
							1
							1
							1
							1
							1
							1
							1
							1
							1
							1
							1
							1
							1
							1
							1
							1
							1
							1
							1
							1
							1
							1
							1
							1
							1
							1
							1
							1
							1
							1
							1
							1
							1
							1
							1
							1
							1
							1
							1
							1
							1
							1
							1
							1
							1
							1
							1
							1
							1
							1
							1
							1
							1
							1
							1
							1
							1
							1
							1
							1
							1
							1
							1
							1
							1
							1
							1
							1
							1
							1
							1
							1
							1
							1
							1
							1
							1
							1
							1
							1
							1
							1
							1
							1
							1
							1
							1
							1
							1
							1
							1
							1
							1
							1
							1
							1
							1
							1
							1
							1
							1
							1
							1
							1
							1
							1
							1
							1
							1
							1
							1
							1
							1
							1
							1
							1
							1
							1
							1
							1
							1
							1
							1
							1
							1
							1
							1
							1
							1
							1
							1
							1
							1
							1
							1
							1
							1
							1
							1
							1
							1
							1
							1
							1
							1
							1
							1
							1
							1
							1
							1
							1
							1
							1
							1
							1
							1
							1
							1
							1
							1
							1
							1
							1
							1
							1
							1
							1
							1
							1
							1
							1
							1
							1
							1
							1
							1
							1
							1
							1
							1
							1
							1
							1
							1
							1
							1
							1
							1
							1
							1
							1
							1
							1
							1
							1
							1
							1
							1
							1
							1
							1
							1
							1
							1
							1
							1
							1
							1
							1
							1
							1
							1
							1
							1
							1
							1
							1
							1
							1
							1
							1
							1
							1
							1
							1
							1
							1
							1
							1
							1
							1
							1
							1
							1
							1
							1
							1
							1
							1
							1
							1
							1
							1
							1
							1
							1
							1
							1
							1
							1
							1
							1
							1
							1
							1
							1
							1
							1
							1
							1
							1
							1
							1
							1
							1
							1
							1
							1
							1
							1
							1
							1
							1
							1
							1
							1
							1
							1
							1
							1
							1
							1
							1
							1
							1
							1
							1
							1
							1
							1
							1
							1
							1
							1
							1
							1
							1
							1
							1
							1
							1
							1
							1
							1
							1
							1
							1
							1
							1
							1
							1
							1
							1
							1
							1
							1
							1
							1
							1
							1
							1
							1
							1
							1
							1
							1
							1
							1
							1
							1
							1
							1
							1
							1
							1
							1
							1
							1
							1
							1
							1
							1
							1
							1
							1
							1
							1
							1
							1
							1
							1
							1
							1
							1
							1
							1
							1
							1
							1
							1
							1
							1
							1
							1
							1
							1
							1
							1
							1
							1
							1
							1
							1
							1
							1
							1
							1
							1
							1
							1
							1
							1
							1
							1
							1
							1
							1
							1
							1
							1
							1
							1
							1
							1
							1
							1
							1
							1
							1
							1
							1
							1
							1
							1
							1
							1
							1
							1
							1
							1
							1
							1
							1
							1
							1
							1
							1
							1
							1
							1
							1
							1
							1
							1
							1
							1
							1
							1
							1
							1
							1
							1
							1
							1
							1
							1
							1
							1
							1
							1
							1
							1
							1
							1
							1
							1
							1
							1
							1
							1
							1
							1
							1
							1
							1
							1
							1
							1
							1
							1
							1
							1
							1
							1
							1
							1
							1
							1
							1
							1
							1
							1
							1
							1
							1
							1
							1
							1
							1
							1
							1
							1
							1
							1
							1
							1
							1
							1
							1
							1
							1
							1
							1
							1
							1
							1
							1
							1
							1
							1
							1
							1
							1
							1
							1
							1
							1
							1
							1
							1
							1
							1
							1
							1
							1
							1
							1
							1
							1
							1
							1
							1
							1
							1
							1
							1
							1
							1
							1
							1
							1
							1
							1
							1
							1
							1
							1
							1
							1
							1
							1
							1
							1
							1
							1
							1
							1
							1
							1
							1
							1
							1
							1
							1
							1
							1
							1
							1
							1
							1
							1
							1
							1
							1
							1
							1
							1
							1
							1
							1
							1
							1
							1
							1
							1
							1
							1
							1
							1
							1
							1
							1
							1
							1
							1
							1
							1
							1
							1
							1
							1
							1
							1
							1
							1
							1
							1
							1
							1
							1
							1
							1
							1
							1
							1
							1
							1
							1
							1
							1
							1
							1
							1
							1
							1
							1
							1
							1
							1
							1
							1
							1
							1
							1
							1
							1
							1
							1
							1
							1
							1
							1
							1
							1
							1
							1
							1
							1
							1
							1
							1
							1
							1
							1
							1
							1
							1
							1
							1
							1
							1
							1
							1
							1
							1
							1
							1
							1
							1
							1
							1
							1
							1
							1
							1
							1
							1
							1
							1
							1
							1
							1
							1
							1
							1
							1
							1
							1
							1
							1
							1
							1
							1
							1
							1
							1
							1
							1
							1
							1
							1
							1
							1
							1
							1
							1
							1
							1
							1
							1
							1
							1
							1
							1
							1
							1
							1
							1
							1
							1
							1
							1
							1
							1
							1
							1
							1
							1
							1
							1
							1
							1
							1
							1
							1
							1
							1
							1
							1
							1
							1
							1
							1
							1
							1
							1
							1
							1
							1
							1
							1
							1
							1
							1
							1
							1
							1
							1
							1
							1
							1
							1
							1
							1
							1
							1
							1
							1
							1
							1
							1
							1
							1
							1
							1
							1
							1
							1
							1
							1
							1
							1
							1
							1
							1
							1
							1
							1
							1
							1
							1
							1
							1
							1
							1
							1
							1
							1
							1
							1
							1
							1
							1
							1
							1
							1
							1
							1
							1
							1
							1
							1
							1
							1
							1
							1
							1
							1
							1
							1
							1
							1
							1
							1
							1
							1
							1
							1
							1
							1
							1
							1
							1
							1
							1
							1
							1
							1
							1
							1
							1
[truncated: 1,046,576+ more rows]
